# Supplementary material for: Association between various insulin resistance indices and cardiovascular disease in middle-aged and elderly individuals: evidence from two prospectives nationwide cohort surveys
Source: PubMed Central journal article supplement (PMC11620891; doi:10.3389/fendo.2024.1483468), 2024-11-22
Supplement: DataSheet1.pdf [file DataSheet1.pdf]

## Supplemental materials

### Supplemental Tables

**Supplementary Table 1** Association of eGDR, TyG, TG/HDL-C, and METS-IR with heart disease.

**Supplementary Table 2** Association of eGDR, TyG, TG/HDL-C, and METS-IR with stroke.

**Supplementary Table 3** The association of estimated glucose disposal rate with cardiovascular disease, heart disease, and stroke among non-diabetes mellitus participants.

**Supplementary Table 4** Improvement in discrimination and risk reclassification for heart disease after adding eGDR, TyG, TG/HDL-C or METS-IR.

**Supplementary Table 5** Improvement in discrimination and risk reclassification for stroke after adding eGDR, TyG, TG/HDL-C or METS-IR.

### Supplemental Figures

**Supplementary Figure 1** Restricted cubic spline curves for cardiovascular diseases, heart disease and stroke according to the eGDR from NHANES and CHARLS cohorts.

**Supplementary Figure 2** Restricted cubic spline curves for cardiovascular diseases, heart disease and stroke according to the TyG from NHANES and CHARLS cohorts.

**Supplementary Figure 3** Restricted cubic spline curves for cardiovascular diseases, heart disease and stroke according to the TG/HDL-C from NHANES and CHARLS cohorts.

**Supplementary Figure 4** Restricted cubic spline curves for cardiovascular diseases, heart disease and stroke according to the METS-IR from NHANES and CHARLS cohorts.

**Supplementary Figure 5** Subgroup analysis of the association between (A) eGDR, (B) TyG, (C) TG-HDL, (D) METS-IR and heart disease.

**Supplementary Figure 6** Subgroup analysis of the association between (A) eGDR, (B) TyG, (C) TG-HDL, (D) METS-IR and stroke.

**Supplementary Figure 7** Subgroup and interaction analyses among the quartile 1–4 and cardiovascular diseases across various subgroups. (A) eGDR, (B) TyG, (C) TG-HDL, (D) METS-IR.

**Supplementary Figure 8** Subgroup and interaction analyses among the quartile 1–4 and heart disease across various subgroups. (A) eGDR, (B) TyG, (C) TG-HDL, (D) METS-IR.

**Supplementary Figure 9** Subgroup and interaction analyses among the quartile 1–4 and stroke across various subgroups. (A) eGDR, (B) TyG, (C) TG-HDL, (D) METS-IR.

**Supplementary Figure 10** The receiver operating characteristic curves of eGDR, TyG, TG/HDL-C and

METS-IR to predict heart disease.

**Supplementary Figure 11** The decision curve analysis of eGDR, TyG, TG/HDL-C and METS-IR to compare the clinical utility for heart disease, the y-axis represents net benefits, calculated by subtracting the relative harm (false positives) from the benefits (true positives). The x-axis calculates the threshold probability.

**Supplementary Figure 12** The receiver operating characteristic curves of eGDR, TyG, TG/HDL-C and METS-IR to predict stroke.

**Supplementary Figure 13** The decision curve analysis of eGDR, TyG, TG/HDL-C and METS-IR to compare the clinical utility for stroke, the y-axis represents net benefits, calculated by subtracting the relative harm (false positives) from the benefits (true positives). The x-axis calculates the threshold probability.

**Supplementary Table 1** Association of eGDR, TyG, TG/HDL-C, and METS-IR with heart disease

| Index           | NHANES            |         |                   |         |                   |         | CHARLS            |         |                   |         |                   |         |
|-----------------|-------------------|---------|-------------------|---------|-------------------|---------|-------------------|---------|-------------------|---------|-------------------|---------|
|                 | Model 1           |         | Model 2           |         | Model 3           |         | Model 1           |         | Model 2           |         | Model 3           |         |
|                 | OR (95% CI)       | P value | OR (95% CI)       | P value | OR (95% CI)       | P value | OR (95% CI)       | P value | OR (95% CI)       | P value | OR (95% CI)       | P value |
| <b>eGDR</b>     |                   |         |                   |         |                   |         |                   |         |                   |         |                   |         |
| Continues       | 0.78 (0.76, 0.80) | < 0.001 | 0.79 (0.77, 0.82) | < 0.001 | 0.84 (0.81, 0.87) | < 0.001 | 0.90 (0.87, 0.93) | < 0.001 | 0.91 (0.88, 0.95) | < 0.001 | 0.92 (0.88, 0.96) | < 0.001 |
| Quartiles       |                   |         |                   |         |                   |         |                   |         |                   |         |                   |         |
| Q1              | Ref               |         | Ref               |         | Ref               |         | Ref               |         | Ref               |         | Ref               |         |
| Q2              | 0.70 (0.59, 0.82) | < 0.001 | 0.65 (0.54, 0.77) | < 0.001 | 0.80 (0.66, 0.98) | 0.030   | 0.73 (0.58, 0.91) | 0.007   | 0.74 (0.59, 0.94) | 0.010   | 0.77 (0.60, 0.97) | 0.030   |
| Q3              | 0.38 (0.32, 0.46) | < 0.001 | 0.40 (0.33, 0.48) | < 0.001 | 0.53 (0.42, 0.66) | < 0.001 | 0.58 (0.45, 0.74) | < 0.001 | 0.63 (0.49, 0.81) | < 0.001 | 0.66 (0.51, 0.85) | 0.002   |
| Q4              | 0.16 (0.12, 0.20) | < 0.001 | 0.21 (0.16, 0.27) | < 0.001 | 0.33 (0.24, 0.44) | < 0.001 | 0.56 (0.44, 0.71) | < 0.001 | 0.60 (0.47, 0.77) | < 0.001 | 0.64 (0.49, 0.84) | 0.001   |
| P for trend     |                   | < 0.001 |                   | < 0.001 |                   | < 0.001 |                   | < 0.001 |                   | < 0.001 |                   | < 0.001 |
| <b>TyG</b>      |                   |         |                   |         |                   |         |                   |         |                   |         |                   |         |
| Continues       | 1.53 (1.37, 1.71) | < 0.001 | 1.54 (1.37, 1.72) | < 0.001 | 1.46 (1.14, 1.87) | 0.003   | 1.18 (1.03, 1.34) | 0.013   | 1.17 (1.02, 1.33) | 0.020   | 1.34 (1.00, 1.79) | 0.052   |
| Quartiles       |                   |         |                   |         |                   |         |                   |         |                   |         |                   |         |
| Q1              | Ref               |         | Ref               |         | Ref               |         | Ref               |         | Ref               |         | Ref               |         |
| Q2              | 1.01 (0.83, 1.25) | 0.900   | 0.96 (0.77, 1.19) | 0.700   | 0.95 (0.75, 1.20) | 0.670   | 1.10 (0.85, 1.44) | 0.457   | 1.08 (0.83, 1.41) | 0.554   | 1.07 (0.81, 1.40) | 0.646   |
| Q3              | 1.28 (1.05, 1.56) | 0.020   | 1.21 (0.98, 1.49) | 0.070   | 1.13 (0.88, 1.46) | 0.330   | 1.34 (1.04, 1.72) | 0.024   | 1.28 (0.99, 1.65) | 0.061   | 1.26 (0.94, 1.68) | 0.118   |
| Q4              | 1.85 (1.53, 2.23) | < 0.001 | 1.78 (1.46, 2.16) | < 0.001 | 1.44 (1.02, 2.02) | 0.040   | 1.43 (1.12, 1.84) | 0.005   | 1.40 (1.09, 1.80) | 0.009   | 1.47 (1.02, 2.14) | 0.042   |
| P for trend     |                   | < 0.001 |                   | < 0.001 |                   | 0.040   |                   | 0.002   |                   | 0.004   |                   | 0.031   |
| <b>TG/HDL-C</b> |                   |         |                   |         |                   |         |                   |         |                   |         |                   |         |
| Continues       | 1.12 (1.09, 1.15) | < 0.001 | 1.12 (1.09, 1.16) | < 0.001 | 1.00 (0.92, 1.09) | 0.918   | 1.00 (0.98, 1.02) | 0.670   | 1.01 (0.98, 1.03) | 0.536   | 0.98 (0.91, 1.04) | 0.470   |
| Quartiles       |                   |         |                   |         |                   |         |                   |         |                   |         |                   |         |
| Q1              | Ref               |         | Ref               |         | Ref               |         | Ref               |         | Ref               |         | Ref               |         |
| Q2              | 1.40 (1.14, 1.72) | 0.002   | 1.33 (1.07, 1.65) | 0.010   | 1.21 (0.94, 1.56) | 0.150   | 0.82 (0.63, 1.06) | 0.131   | 0.82 (0.63, 1.06) | 0.130   | 0.78 (0.58, 1.05) | 0.103   |
| Q3              | 1.57 (1.29, 1.93) | < 0.001 | 1.48 (1.20, 1.83) | < 0.001 | 1.17 (0.86, 1.60) | 0.310   | 1.22 (0.96, 1.56) | 0.098   | 1.22 (0.96, 1.56) | 0.104   | 1.13 (0.82, 1.56) | 0.465   |
| Q4              | 2.09 (1.72, 2.54) | < 0.001 | 2.08 (1.69, 2.56) | < 0.001 | 1.44 (0.92, 2.25) | 0.110   | 1.12 (0.88, 1.44) | 0.345   | 1.14 (0.89, 1.47) | 0.283   | 1.06 (0.68, 1.66) | 0.793   |
| P for trend     |                   | < 0.001 |                   | < 0.001 |                   | 0.210   |                   | 0.059   |                   | 0.045   |                   | 0.346   |
| <b>METS-IR</b>  |                   |         |                   |         |                   |         |                   |         |                   |         |                   |         |
| Continues       | 2.31 (1.98, 2.70) | < 0.001 | 2.72 (2.29, 3.23) | < 0.001 | 1.99 (1.45, 2.73) | < 0.001 | 1.39 (1.13, 1.70) | 0.002   | 1.42 (1.16, 1.75) | < 0.001 | 2.06 (1.34, 3.12) | < 0.001 |
| Quartiles       |                   |         |                   |         |                   |         |                   |         |                   |         |                   |         |
| Q1              | Ref               |         | Ref               |         | Ref               |         | Ref               |         | Ref               |         | Ref               |         |
| Q2              | 1.26 (1.02, 1.56) | 0.030   | 1.28 (1.02, 1.60) | 0.030   | 1.14 (0.89, 1.47) | 0.310   | 1.02 (0.79, 1.34) | 0.858   | 1.04 (0.80, 1.36) | 0.775   | 1.06 (0.80, 1.40) | 0.710   |
| Q3              | 1.64 (1.34, 2.01) | < 0.001 | 1.66 (1.34, 2.06) | < 0.001 | 1.25 (0.93, 1.68) | 0.140   | 1.41 (1.10, 1.81) | 0.007   | 1.44 (1.12, 1.86) | 0.005   | 1.50 (1.11, 2.01) | 0.008   |
| Q4              | 2.39 (1.97, 2.91) | < 0.001 | 2.74 (2.23, 3.38) | < 0.001 | 1.63 (1.14, 2.32) | 0.007   | 1.44 (1.12, 1.85) | 0.004   | 1.48 (1.15, 1.90) | 0.003   | 1.63 (1.11, 2.38) | 0.012   |
| P for trend     |                   | < 0.001 |                   | < 0.001 |                   | 0.006   |                   | < 0.001 |                   | < 0.001 |                   | 0.0027  |

Model 1: unadjusted

Model 2: adjusted for age, sex, marital status, education, smoking, and alcohol consumption status

Model 3: model 2 + further adjusted for region, total cholesterol, high-density lipoprotein cholesterol, triglyceride, low-density lipoprotein cholesterol, blood urea nitrogen, uric acid, hemoglobin, and obesity

Abbreviations: CHARLS, China Health and Retirement Longitudinal Study; CI, confidence interval; eGDR, estimated glucose disposal rate; TyG, triglyceride glucose; TG, triglyceride; HDL-C, high-density lipoprotein cholesterol; METS-IR, metabolic score for insulin resistance; NHANES, National Health and Nutrition Examination Survey; OR, odd ratio.

**Supplementary Table 2** Association of eGDR, TyG, TG/HDL-C, and METS-IR with stroke

| Index          | NHANES            |         |                   |         |                   |         | CHARLS            |         |                   |         |                   |         |
|----------------|-------------------|---------|-------------------|---------|-------------------|---------|-------------------|---------|-------------------|---------|-------------------|---------|
|                | Model 1           |         | Model 2           |         | Model 3           |         | Model 1           |         | Model 2           |         | Model 3           |         |
|                | OR (95% CI)       | P value | OR (95% CI)       | P value | OR (95% CI)       | P value | OR (95% CI)       | P value | OR (95% CI)       | P value | OR (95% CI)       | P value |
| <b>eGDR</b>    |                   |         |                   |         |                   |         |                   |         |                   |         |                   |         |
| Continues      | 0.83 (0.79, 0.86) | < 0.001 | 0.84 (0.81, 0.88) | < 0.001 | 0.85 (0.81, 0.90) | < 0.001 | 0.87 (0.82, 0.92) | < 0.001 | 0.88 (0.83, 0.93) | < 0.001 | 0.91 (0.86, 0.97) | 0.003   |
| Quartiles      |                   |         |                   |         |                   |         |                   |         |                   |         |                   |         |
| Q1             | Ref               |         | Ref               |         | Ref               |         | Ref               |         | Ref               |         | Ref               |         |
| Q2             | 0.77 (0.60, 0.98) | 0.032   | 0.74 (0.58, 0.95) | 0.020   | 0.77 (0.58, 1.02) | 0.071   | 0.68 (0.49, 0.92) | 0.014   | 0.69 (0.50, 0.94) | 0.019   | 0.76 (0.55, 1.05) | 0.100   |
| Q3             | 0.54 (0.41, 0.70) | < 0.001 | 0.57 (0.43, 0.74) | < 0.001 | 0.59 (0.43, 0.80) | < 0.001 | 0.58 (0.42, 0.80) | 0.001   | 0.62 (0.44, 0.86) | 0.005   | 0.73 (0.51, 1.04) | 0.081   |
| Q4             | 0.19 (0.13, 0.27) | < 0.001 | 0.25 (0.17, 0.36) | < 0.001 | 0.27 (0.17, 0.42) | < 0.001 | 0.43 (0.30, 0.61) | < 0.001 | 0.45 (0.31, 0.64) | < 0.001 | 0.58 (0.39, 0.85) | 0.006   |
| P for trend    |                   | < 0.001 |                   | < 0.001 |                   | < 0.001 |                   | < 0.001 |                   | < 0.001 |                   | 0.006   |
| <b>TyG</b>     |                   |         |                   |         |                   |         |                   |         |                   |         |                   |         |
| Continues      | 1.06 (0.90, 1.25) | 0.450   | 1.00 (0.85, 1.19) | 0.960   | 1.15 (0.80, 1.64) | 0.430   | 1.48 (1.24, 1.74) | < 0.001 | 1.50 (1.26, 1.78) | < 0.001 | 1.42 (0.98, 2.07) | 0.067   |
| Quartiles      |                   |         |                   |         |                   |         |                   |         |                   |         |                   |         |
| Q1             | Ref               |         | Ref               |         | Ref               |         | Ref               |         | Ref               |         | Ref               |         |
| Q2             | 0.85 (0.64, 1.13) | 0.250   | 0.81 (0.61, 1.08) | 0.150   | 0.85 (0.62, 1.16) | 0.310   | 1.66 (1.13, 2.49) | 0.012   | 1.66 (1.13, 2.49) | 0.012   | 1.43 (0.96, 2.16) | 0.085   |
| Q3             | 0.87 (0.65, 1.15) | 0.320   | 0.80 (0.60, 1.07) | 0.140   | 0.88 (0.62, 1.27) | 0.500   | 2.09 (1.43, 3.08) | < 0.001 | 2.08 (1.42, 3.07) | < 0.001 | 1.54 (1.02, 2.36) | 0.043   |
| Q4             | 1.07 (0.82, 1.40) | 0.630   | 0.96 (0.73, 1.27) | 0.780   | 1.09 (0.66, 1.76) | 0.740   | 2.13 (1.47, 3.14) | < 0.001 | 2.19 (1.51, 3.24) | < 0.001 | 1.31 (0.79, 2.18) | 0.303   |
| P for trend    |                   | 0.600   |                   | 0.810   |                   | 0.950   |                   | < 0.001 |                   | < 0.001 |                   | 0.274   |
| <b>TG-HDL</b>  |                   |         |                   |         |                   |         |                   |         |                   |         |                   |         |
| Continues      | 1.01 (0.96, 1.06) | 0.650   | 1.00 (0.95, 1.05) | 0.960   | 1.03 (0.90, 1.14) | 0.580   | 1.03 (1.01, 1.05) | 0.008   | 1.03 (1.01, 1.05) | 0.004   | 0.96 (0.88, 1.03) | 0.294   |
| Quartiles      |                   |         |                   |         |                   |         |                   |         |                   |         |                   |         |
| Q1             | Ref               |         | Ref               |         | Ref               |         | Ref               |         | Ref               |         | Ref               |         |
| Q2             | 1.00 (0.75, 1.33) | 0.990   | 0.93 (0.70, 1.25) | 0.640   | 1.09 (0.77, 1.55) | 0.620   | 1.81 (1.23, 2.71) | 0.003   | 1.84 (1.25, 2.75) | 0.003   | 1.55 (1.01, 2.41) | 0.048   |
| Q3             | 0.92 (0.69, 1.23) | 0.560   | 0.82 (0.61, 1.11) | 0.200   | 1.06 (0.68, 1.66) | 0.790   | 1.97 (1.35, 2.93) | < 0.001 | 2.00 (1.36, 2.98) | < 0.001 | 1.46 (0.90, 2.39) | 0.131   |
| Q4             | 1.18 (0.90, 1.55) | 0.230   | 1.09 (0.82, 1.45) | 0.540   | 1.87 (0.99, 3.51) | 0.050   | 2.27 (1.56, 3.36) | < 0.001 | 2.34 (1.61, 3.47) | < 0.001 | 1.40 (0.76, 2.61) | 0.282   |
| P for trend    |                   | 0.330   |                   | 0.700   |                   | 0.190   |                   | < 0.001 |                   | < 0.001 |                   | 0.455   |
| <b>METS-IR</b> |                   |         |                   |         |                   |         |                   |         |                   |         |                   |         |
| Continues      | 1.37 (1.08, 1.73) | 0.008   | 1.40 (1.10, 1.78) | 0.007   | 1.48 (0.94, 2.30) | 0.090   | 1.95 (1.49, 2.54) | < 0.001 | 2.07 (1.58, 2.69) | < 0.001 | 2.08 (1.17, 3.62) | 0.011   |
| Quartiles      |                   |         |                   |         |                   |         |                   |         |                   |         |                   |         |
| Q1             | Ref               |         | Ref               |         | Ref               |         | Ref               |         | Ref               |         | Ref               |         |
| Q2             | 0.90 (0.67, 1.21) | 0.500   | 0.91 (0.67, 1.23) | 0.540   | 0.87 (0.62, 1.23) | 0.430   | 1.89 (1.26, 2.88) | 0.002   | 2.00 (1.33, 3.06) | 0.001   | 1.80 (1.18, 2.79) | 0.007   |
| Q3             | 0.97 (0.72, 1.29) | 0.830   | 0.94 (0.70, 1.26) | 0.670   | 0.83 (0.55, 1.24) | 0.360   | 2.40 (1.63, 3.61) | < 0.001 | 2.58 (1.74, 3.89) | < 0.001 | 2.09 (1.34, 3.32) | 0.001   |
| Q4             | 1.32 (1.00, 1.73) | 0.05    | 1.33 (1.01, 1.77) | 0.040   | 1.12 (0.69, 1.83) | 0.650   | 2.58 (1.75, 3.86) | < 0.001 | 2.79 (1.89, 4.20) | < 0.001 | 1.91 (1.11, 3.31) | 0.021   |
| P for trend    |                   | 0.04    |                   | 0.040   |                   | 0.590   |                   | < 0.001 |                   | < 0.001 |                   | 0.021   |

Model 1: unadjusted

Model 2: adjusted for age, sex, marital status, education, smoking, and alcohol consumption status

Model 3: model 2 + further adjusted for region, total cholesterol, high-density lipoprotein cholesterol, triglyceride, low-density lipoprotein cholesterol, blood urea nitrogen, uric acid, hemoglobin, and obesity

Abbreviations: CHARLS, China Health and Retirement Longitudinal Study; CI, confidence interval; eGDR, estimated glucose disposal rate; TyG, triglyceride glucose; TG, triglyceride; HDL-C, high-density lipoprotein cholesterol; METS-IR, metabolic score for insulin resistance; NHANES, National Health and Nutrition Examination Survey; OR, odd ratio.

**Supplementary Table 3** The association of estimated glucose disposal rate with cardiovascular diseases among non-diabetes mellitus participants

| Index           | NHANES                  |         |                   |         |                   |         | CHARLS                  |         |                   |         |                   |         |
|-----------------|-------------------------|---------|-------------------|---------|-------------------|---------|-------------------------|---------|-------------------|---------|-------------------|---------|
|                 | Cardiovascular diseases |         | Heart disease     |         | Stroke            |         | Cardiovascular diseases |         | Heart disease     |         | Stroke            |         |
|                 | OR (95% CI)             | P value | OR (95% CI)       | P value | OR (95% CI)       | P value | OR (95% CI)             | P value | OR (95% CI)       | P value | OR (95% CI)       | P value |
| <b>eGDR</b>     |                         |         |                   |         |                   |         |                         |         |                   |         |                   |         |
| Continues       | 0.82 (0.78, 0.86)       | < 0.001 | 0.83 (0.78, 0.87) | < 0.001 | 0.82 (0.76, 0.89) | < 0.001 | 0.91 (0.87, 0.95)       | < 0.001 | 0.93 (0.89, 0.98) | 0.004   | 0.91 (0.85, 0.97) | 0.007   |
| Quartiles       |                         |         |                   |         |                   |         |                         |         |                   |         |                   |         |
| Q1              | Ref                     |         | Ref               |         | Ref               |         | Ref                     |         | Ref               |         | Ref               |         |
| Q2              | 0.77 (0.59, 1.00)       | 0.054   | 0.77 (0.59, 1.00) | 0.054   | 0.91 (0.63, 1.32) | 0.62    | 0.69 (0.53, 0.89)       | 0.005   | 0.69 (0.53, 0.89) | 0.005   | 0.84 (0.59, 1.20) | 0.344   |
| Q3              | 0.48 (0.36, 0.64)       | < 0.001 | 0.48 (0.36, 0.64) | < 0.001 | 0.48 (0.32, 0.72) | < 0.001 | 0.70 (0.53, 0.93)       | 0.013   | 0.70 (0.53, 0.93) | 0.013   | 0.84 (0.57, 1.24) | 0.386   |
| Q4              | 0.31 (0.21, 0.46)       | < 0.001 | 0.31 (0.21, 0.46) | < 0.001 | 0.33 (0.19, 0.56) | < 0.001 | 0.65 (0.49, 0.87)       | 0.004   | 0.65 (0.49, 0.87) | 0.004   | 0.57 (0.36, 0.88) | 0.012   |
| P for trend     |                         | < 0.001 |                   | < 0.001 |                   | < 0.001 |                         | 0.005   |                   | 0.005   |                   | 0.02    |
| <b>TyG</b>      |                         |         |                   |         |                   |         |                         |         |                   |         |                   |         |
| Continues       | 1.36 (0.86, 2.18)       | 0.1957  | 1.85 (1.10, 3.16) | 0.0223  | 0.65 (0.33, 1.32) | 0.2202  | 1.26 (0.86, 1.89)       | 0.2452  | 1.27 (0.81, 2.05) | 0.303   | 1.30 (0.70, 2.51) | 0.4208  |
| Quartiles       |                         |         |                   |         |                   |         |                         |         |                   |         |                   |         |
| Q1              | Ref                     |         | Ref               |         | Ref               |         | Ref                     |         | Ref               |         | Ref               |         |
| Q2              | 0.99 (0.74, 1.34)       | 0.958   | 0.99 (0.74, 1.34) | 0.958   | 0.87 (0.59, 1.29) | 0.481   | 0.92 (0.69, 1.24)       | 0.602   | 0.92 (0.69, 1.24) | 0.602   | 1.20 (0.78, 1.87) | 0.403   |
| Q3              | 1.36 (0.97, 1.91)       | 0.077   | 1.36 (0.97, 1.91) | 0.077   | 0.94 (0.58, 1.54) | 0.818   | 1.14 (0.83, 1.57)       | 0.424   | 1.14 (0.83, 1.57) | 0.424   | 1.19 (0.76, 1.89) | 0.454   |
| Q4              | 1.35 (0.81, 2.25)       | 0.252   | 1.35 (0.81, 2.25) | 0.252   | 1.22 (0.57, 2.60) | 0.609   | 1.26 (0.81, 1.97)       | 0.303   | 1.26 (0.81, 1.97) | 0.303   | 0.80 (0.44, 1.47) | 0.472   |
| P for trend     |                         | 0.09    |                   | 0.09    |                   | 0.907   |                         | 0.236   |                   | 0.236   |                   | 0.664   |
| <b>TG/HDL-C</b> |                         |         |                   |         |                   |         |                         |         |                   |         |                   |         |
| Continues       | 1.01 (0.89, 1.15)       | 0.847   | 0.98 (0.85, 1.12) | 0.756   | 1.07 (0.87, 1.28) | 0.48    | 0.96 (0.87, 1.05)       | 0.416   | 0.95 (0.84, 1.05) | 0.4051  | 0.98 (0.85, 1.10) | 0.772   |
| Quartiles       |                         |         |                   |         |                   |         |                         |         |                   |         |                   |         |
| Q1              | Ref                     |         | Ref               |         | Ref               |         | Ref                     |         | Ref               |         | Ref               |         |
| Q2              | 1.29 (0.93, 1.79)       | 0.129   | 1.29 (0.93, 1.79) | 0.129   | 0.97 (0.63, 1.49) | 0.872   | 0.75 (0.54, 1.03)       | 0.073   | 0.75 (0.54, 1.03) | 0.073   | 1.22 (0.76, 1.96) | 0.412   |
| Q3              | 1.26 (0.85, 1.88)       | 0.252   | 1.26 (0.85, 1.88) | 0.252   | 0.84 (0.48, 1.46) | 0.534   | 1.07 (0.75, 1.55)       | 0.703   | 1.07 (0.75, 1.55) | 0.703   | 1.08 (0.64, 1.86) | 0.778   |
| Q4              | 1.57 (0.89, 2.76)       | 0.118   | 1.57 (0.89, 2.76) | 0.118   | 1.50 (0.68, 3.30) | 0.316   | 0.98 (0.59, 1.64)       | 0.931   | 0.98 (0.59, 1.64) | 0.931   | 0.88 (0.44, 1.82) | 0.734   |
| P for trend     |                         | 0.197   |                   | 0.197   |                   | 0.75    |                         | 0.6     |                   | 0.6     |                   | 0.652   |
| <b>METS-IR</b>  |                         |         |                   |         |                   |         |                         |         |                   |         |                   |         |
| Continues       | 2.15 (1.20, 3.85)       | 0.01    | 2.65 (1.38, 5.09) | 0.003   | 1.03 (0.42, 2.49) | 0.947   | 2.38 (1.35, 4.21)       | 0.003   | 2.11 (1.10, 4.09) | 0.026   | 2.26 (0.90, 5.75) | 0.085   |
| Quartiles       |                         |         |                   |         |                   |         |                         |         |                   |         |                   |         |
| Q1              | Ref                     |         | Ref               |         | Ref               |         | Ref                     |         | Ref               |         | Ref               |         |
| Q2              | 1.39 (1.02, 1.91)       | 0.038   | 1.39 (1.02, 1.91) | 0.038   | 1.02 (0.68, 1.54) | 0.907   | 1.00 (0.74, 1.36)       | 0.999   | 1.00 (0.74, 1.36) | 0.9995  | 2.35 (1.47, 3.84) | 0.0005  |
| Q3              | 1.29 (0.87, 1.92)       | 0.214   | 1.29 (0.87, 1.92) | 0.214   | 0.89 (0.52, 1.53) | 0.685   | 1.34 (0.97, 1.86)       | 0.08    | 1.34 (0.97, 1.86) | 0.08    | 1.84 (1.09, 3.17) | 0.0254  |
| Q4              | 2.02 (1.21, 3.38)       | 0.007   | 2.02 (1.21, 3.38) | 0.007   | 0.95 (0.46, 1.93) | 0.881   | 1.40 (0.90, 2.18)       | 0.136   | 1.40 (0.90, 2.18) | 0.1355  | 2.52 (1.33, 4.86) | 0.0051  |
| P for trend     |                         | 0.02    |                   | 0.02    |                   | 0.792   |                         | 0.0598  |                   | 0.0598  |                   | 0.029   |

Sensitivity analyses were conducted in model 3, adjusted for age, sex, marital status, education, smoking, alcohol consumption status, total cholesterol, high-density lipoprotein

cholesterol, triglyceride, low-density lipoprotein cholesterol, blood urea nitrogen, uric acid, hemoglobin, and obesity.

Abbreviations: CHARLS, China Health and Retirement Longitudinal Study; CI, confidence interval; eGDR, estimated glucose disposal rate; TyG, triglyceride glucose; TG, triglyceride; HDL-C, high-density lipoprotein cholesterol; METS-IR, metabolic score for insulin resistance; NHANES, National Health and Nutrition Examination Survey; OR, odd ratio.



**Supplementary Table 4** Improvement in discrimination and risk reclassification for heart disease after adding eGDR, TyG, TG/HDL-C or METS-IR

| Model          | AUC (95% CI)         | P value | NRI (95% CI)           | P value | IDI (95% CI)         | P value |
|----------------|----------------------|---------|------------------------|---------|----------------------|---------|
| <b>NAHNES</b>  |                      |         |                        |         |                      |         |
| Basic model    | 0.736 (0.720, 0.736) | Ref     | Ref                    | Ref     | Ref                  | Ref     |
| + hypertension | 0.787 (0.773, 0.787) | <0.001  | 0.107 (0.051, 0.162)   | <0.001  | 0.064 (0.052, 0.077) | <0.001  |
| + eGDR         | 0.791 (0.776, 0.791) | <0.001  | 0.130 (0.074, 0.185)   | <0.001  | 0.065 (0.052, 0.077) | <0.001  |
| + TyG          | 0.779 (0.764, 0.779) | <0.001  | -0.008 (-0.064, 0.048) | 0.77    | 0.055 (0.043, 0.068) | <0.001  |
| + TG-HDL       | 0.778 (0.763, 0.778) | <0.001  | -1E-04 (-0.053, 0.053) | 0.996   | 0.055 (0.043, 0.067) | <0.001  |
| + METS-IR      | 0.781 (0.766, 0.781) | <0.001  | -0.014 (-0.072, 0.044) | 0.628   | 0.056 (0.044, 0.069) | <0.001  |
| <b>CHARLS</b>  |                      |         |                        |         |                      |         |
| Basic model    | 0.556 (0.531, 0.556) | Ref     | Ref                    | Ref     | Ref                  | Ref     |
| + hypertension | 0.609 (0.586, 0.609) | <0.001  | 0.002 (-0.005, 0.010)  | 0.507   | 0.005 (0.003, 0.007) | <0.001  |
| + eGDR         | 0.612 (0.588, 0.612) | <0.001  | -0.003 (-0.008, 0.003) | 0.303   | 0.005 (0.003, 0.008) | <0.001  |
| + TyG          | 0.598 (0.573, 0.598) | <0.001  | -9E-04 (-0.007, 0.005) | 0.773   | 0.004 (0.002, 0.006) | <0.001  |
| + TG-HDL       | 0.594 (0.571, 0.594) | 0.001   | 0.002 (-0.005, 0.009)  | 0.538   | 0.004 (0.002, 0.005) | <0.001  |
| + METS-IR      | 0.603 (0.579, 0.603) | <0.001  | 0.005 (-0.004, 0.013)  | 0.297   | 0.005 (0.003, 0.008) | <0.001  |

The basic model included age, sex, marital status, education, smoking, alcohol consumption status, total cholesterol, high-density lipoprotein cholesterol, triglyceride, low-density lipoprotein cholesterol, blood urea nitrogen, uric acid, hemoglobin, and obesity.

Abbreviations: AUC, area under curve; CHARLS, China Health and Retirement Longitudinal Study; CI, confidence interval; eGDR, estimated glucose disposal rate; NRI, net reclassification improvement; Ref, reference; IDI, integrated discrimination improvement; TyG, triglyceride glucose; TG, triglyceride; HDL-C, high-density lipoprotein cholesterol; METS-IR, metabolic score for insulin resistance; NHANES, National Health and Nutrition Examination Survey.

**Supplementary Table 5** Improvement in discrimination and risk reclassification for stroke after adding eGDR, TyG, TG/HDL-C or METS-IR

| Model          | AUC (95% CI)         | P value | NRI (95% CI)           | P value | IDI (95% CI)          | P value |
|----------------|----------------------|---------|------------------------|---------|-----------------------|---------|
| <b>NAHNES</b>  |                      |         |                        |         |                       |         |
| Basic model    | 0.730 (0.707, 0.730) | Ref     | Ref                    | Ref     | Ref                   | Ref     |
| + hypertension | 0.739 (0.717, 0.739) | 0.202   | 1.967 (1.960, 1.975)   | <0.001  | 0.031 (0.031, 0.032)  | <0.001  |
| + eGDR         | 0.746 (0.724, 0.746) | 0.001   | 1.534 (1.507, 1.562)   | <0.001  | 0.022 (0.022, 0.023)  | <0.001  |
| + TyG          | 0.731 (0.708, 0.731) | 0.317   | 0.200 (0.154, 0.247)   | <0.001  | 3E-04 (2E-04, 4E-04)  | <0.001  |
| + TG-HDL       | 0.730 (0.707, 0.730) | 0.930   | -0.041 (-0.087, 0.005) | 0.08    | 1E-04 (0, 1E-04)      | 0.12    |
| + METS-IR      | 0.732 (0.709, 0.732) | 0.254   | 0.235 (0.190, 0.281)   | <0.001  | 0.001 (8E-04, 0.001)  | <0.001  |
| <b>CHARLS</b>  |                      |         |                        |         |                       |         |
| Basic model    | 0.627 (0.595, 0.627) | Ref     | Ref                    | Ref     | Ref                   | Ref     |
| + hypertension | 0.622 (0.589, 0.622) | 0.624   | 0.254 (0.133, 0.374)   | <0.001  | 0.002 (5E-04, 0.002)  | 0.003   |
| + eGDR         | 0.637 (0.604, 0.637) | 0.142   | 0.219 (0.098, 0.339)   | <0.001  | 0.002 (7E-04, 0.003)  | 0.002   |
| + TyG          | 0.632 (0.600, 0.632) | 0.291   | 0.029 (-0.091, 0.150)  | 0.633   | 6E-04 (-2E-04, 0.001) | 0.160   |
| + TG-HDL       | 0.629 (0.597, 0.629) | 0.335   | 0.007 (-0.113, 0.126)  | 0.914   | 1E-04 (-3E-04, 6E-04) | 0.532   |
| + METS-IR      | 0.636 (0.604, 0.636) | 0.107   | 0.077 (-0.044, 0.197)  | 0.213   | 0.001 (1E-04, 0.002)  | 0.039   |

The basic model included age, sex, marital status, education, smoking, alcohol consumption status, total cholesterol, high-density lipoprotein cholesterol, triglyceride, low-density lipoprotein cholesterol, blood urea nitrogen, uric acid, hemoglobin, and obesity.

Abbreviations: AUC, area under curve; CHARLS, China Health and Retirement Longitudinal Study; CI, confidence interval; eGDR, estimated glucose disposal rate; NRI, net reclassification improvement; Ref, reference; IDI, integrated discrimination improvement; TyG, triglyceride glucose; TG, triglyceride; HDL-C, high-density lipoprotein cholesterol; METS-IR, metabolic score for insulin resistance; NHANES, National Health and Nutrition Examination Survey.

Model 1

Model 2

Model 3

NHANES

Cardiovascular diseases

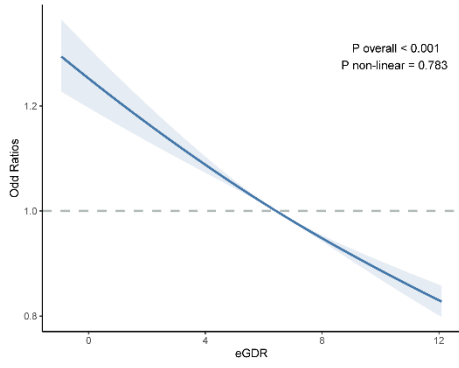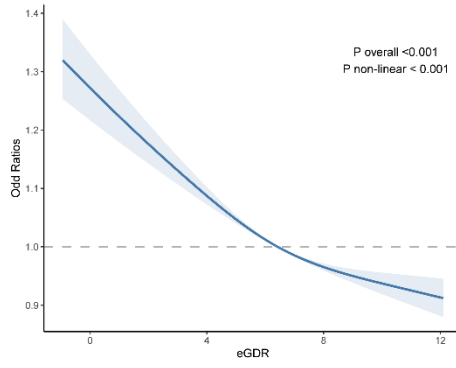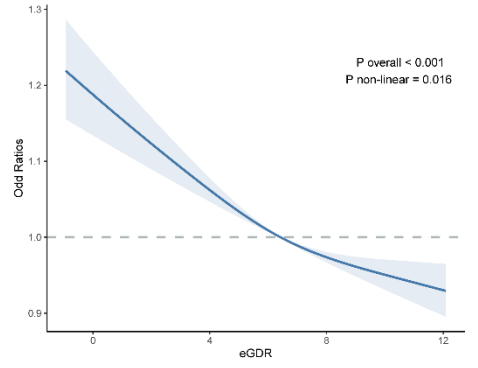

Heart disease

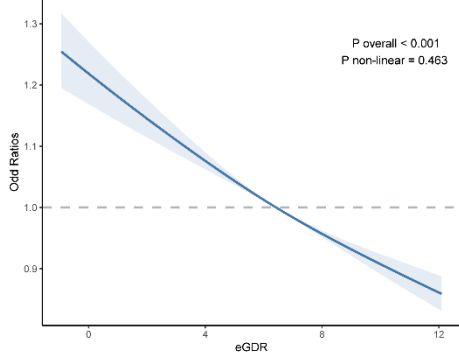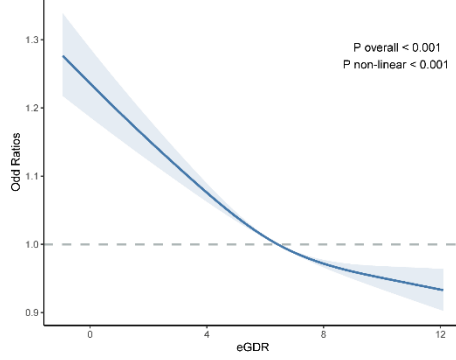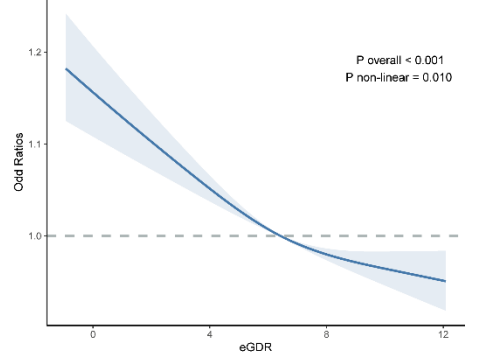

Stroke

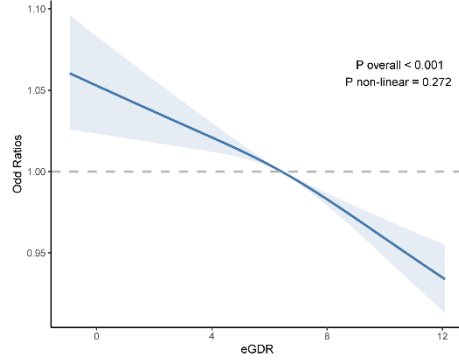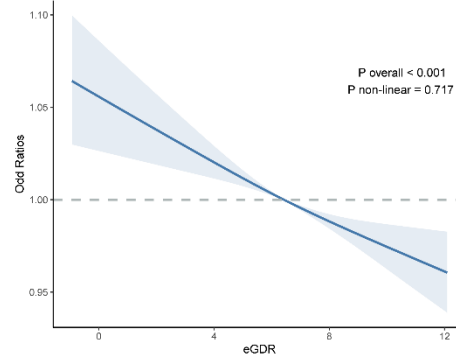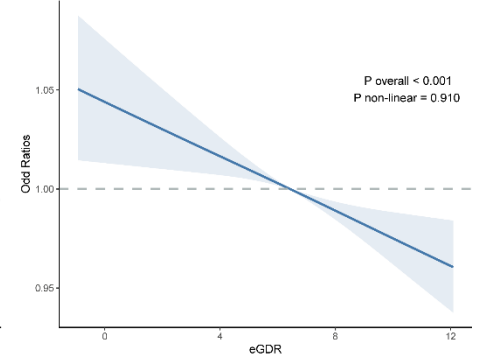

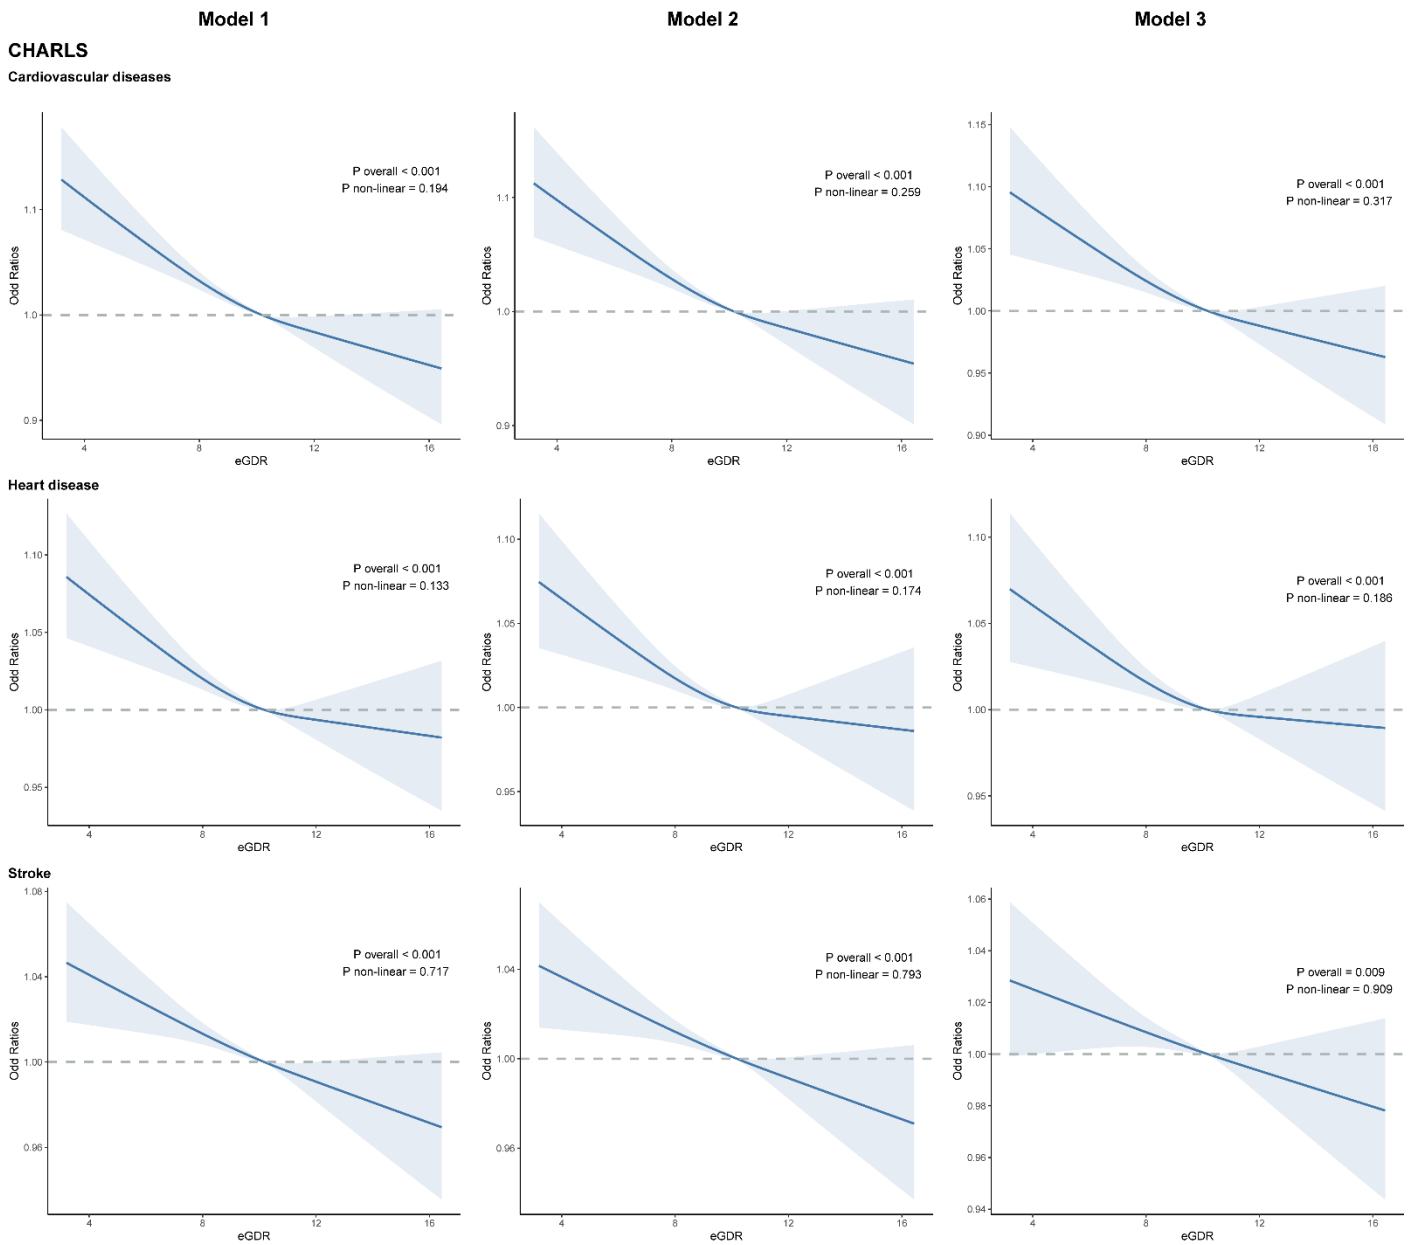

**Supplementary Figure 1** Restricted cubic spline curves for cardiovascular diseases, heart disease and stroke according to the eGDR from NHANES and CHARLS cohorts. Odd ratios are indicated by solid lines and 95% CIs by shaded areas. The horizontal dotted line represents the odd ratio of 1.0. Model 1 was an unadjusted model; model 2 adjusted for age, sex, marital status, education, smoking, and alcohol consumption status; model 3 was model 2 + further adjusted region, total cholesterol, high-density lipoprotein cholesterol, triglyceride, low-density lipoprotein cholesterol, blood urea nitrogen, uric acid, hemoglobin, and obesity.

Model 1

Model 2

Model 3

NHANES

Cardiovascular diseases

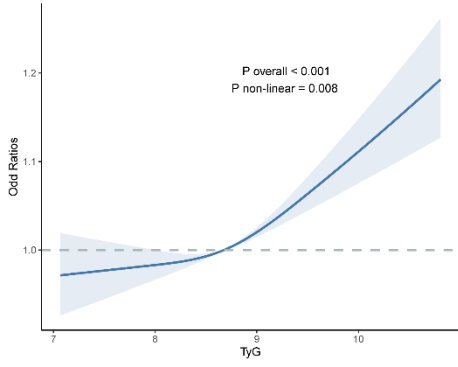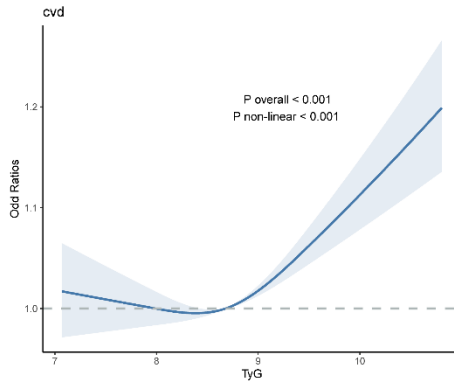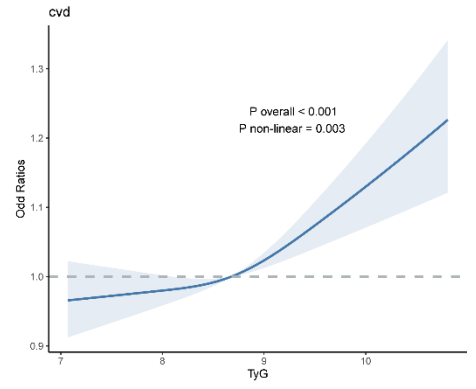

Heart disease

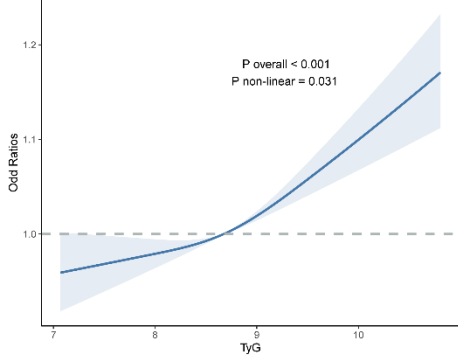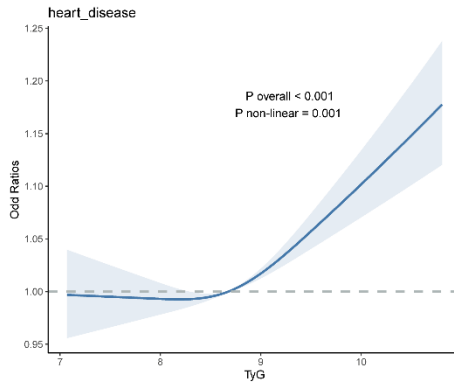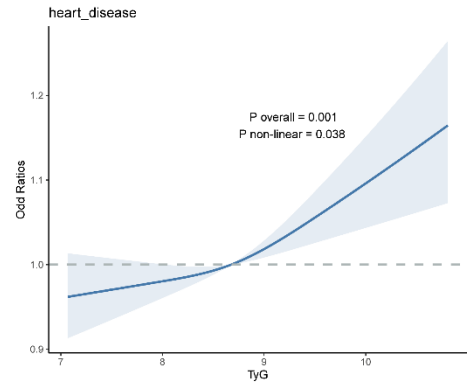

Stroke

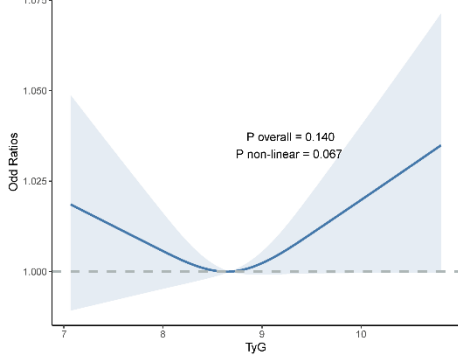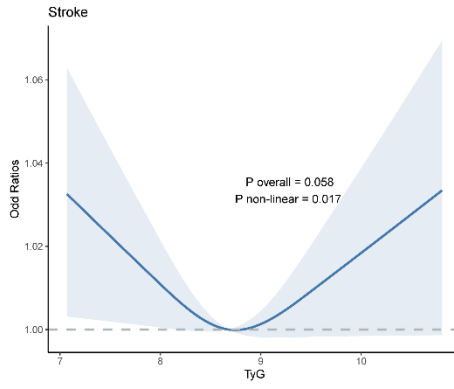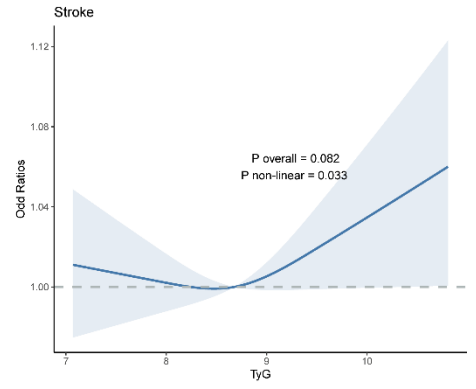

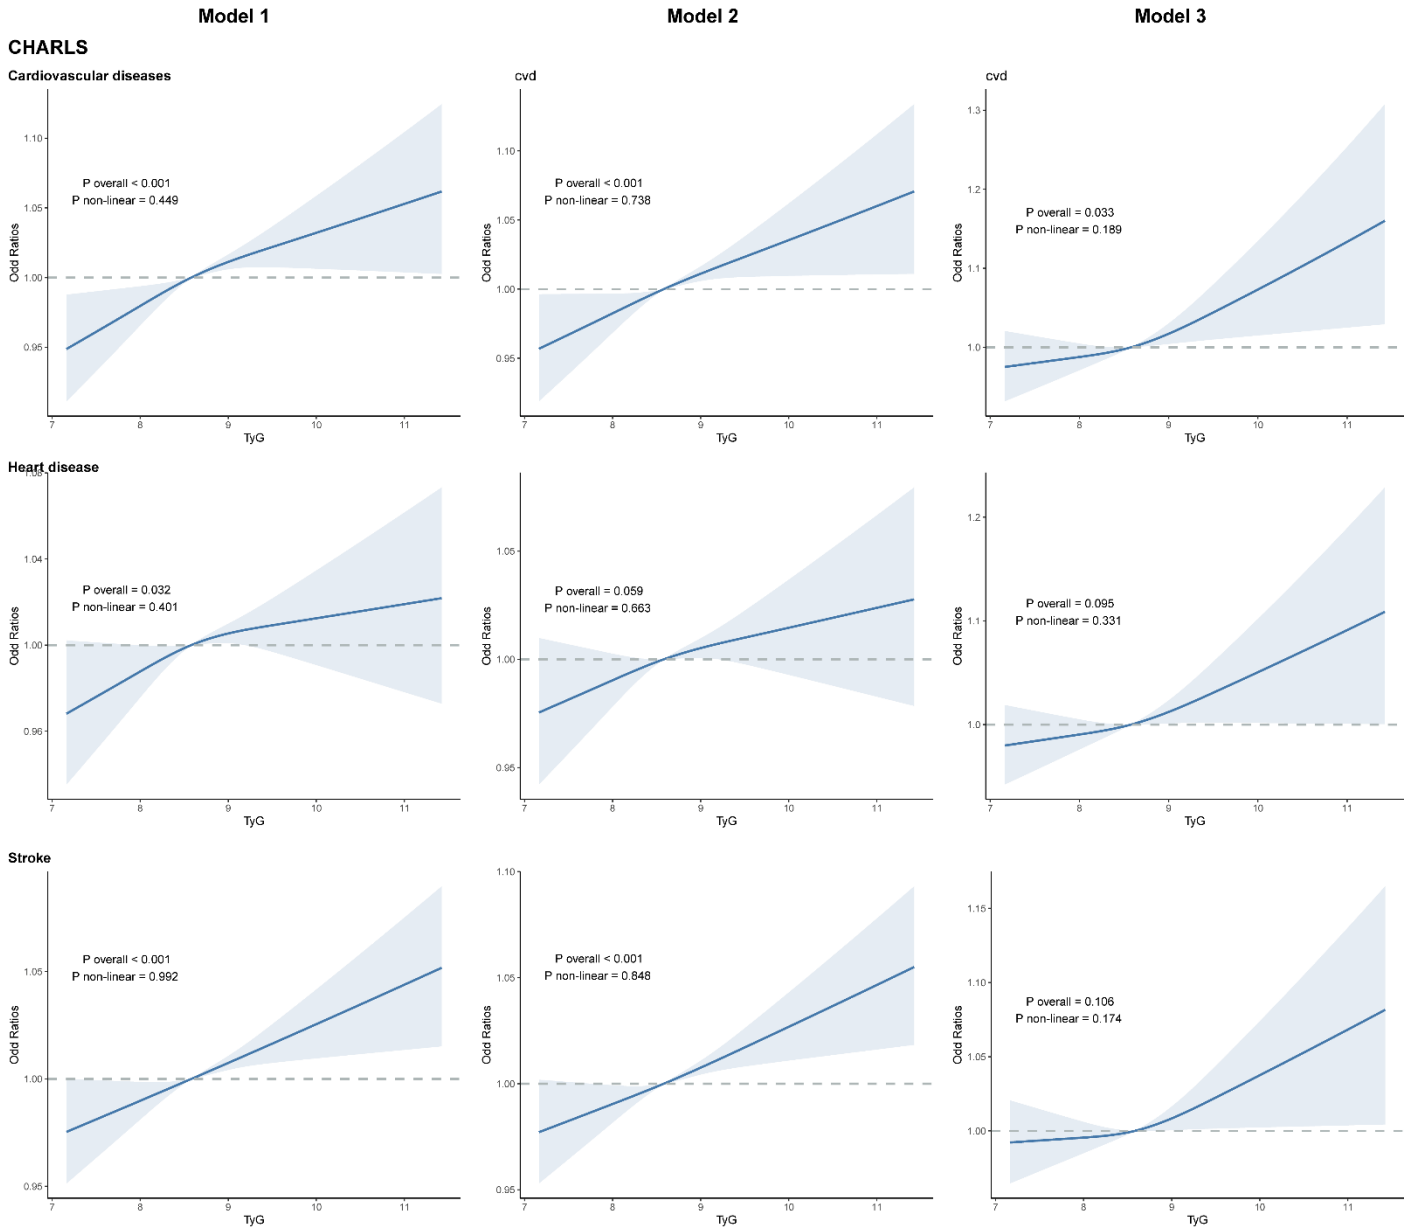

**Supplementary Figure 2** Restricted cubic spline curves for cardiovascular diseases, heart disease and stroke according to the TyG from NHANES and CHARLS cohorts. Odd ratios are indicated by solid lines and 95% CIs by shaded areas. The horizontal dotted line represents the odd ratio of 1.0. Model 1 was an unadjusted model; model 2 adjusted for age, sex, marital status, education, smoking, and alcohol consumption status; model 3 was model 2 + further adjusted region, total cholesterol, high-density lipoprotein cholesterol, triglyceride, low-density lipoprotein cholesterol, blood urea nitrogen, uric acid, hemoglobin, and obesity.

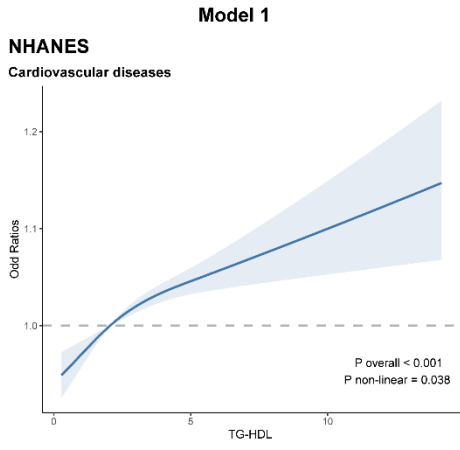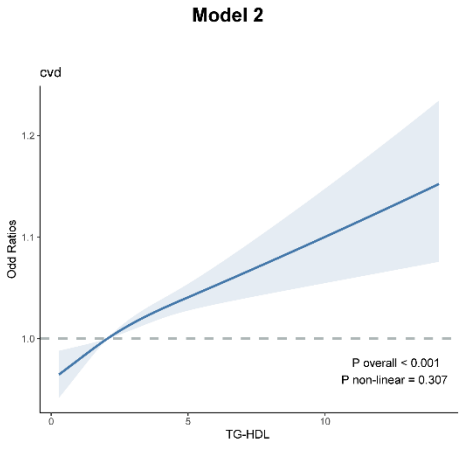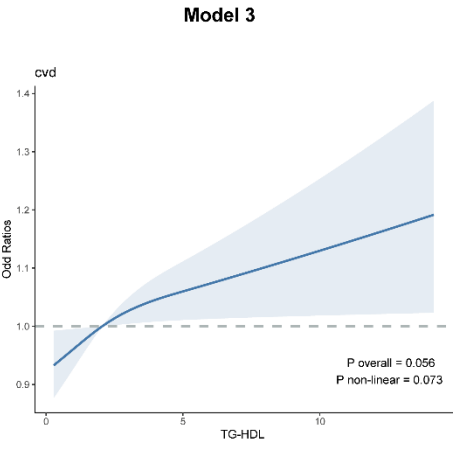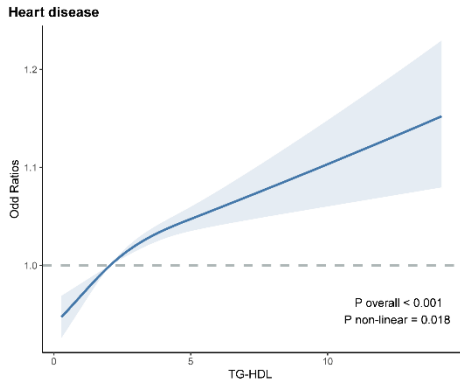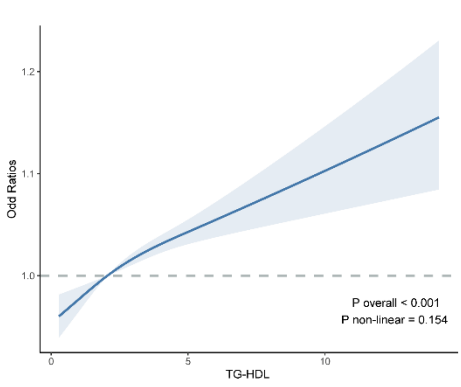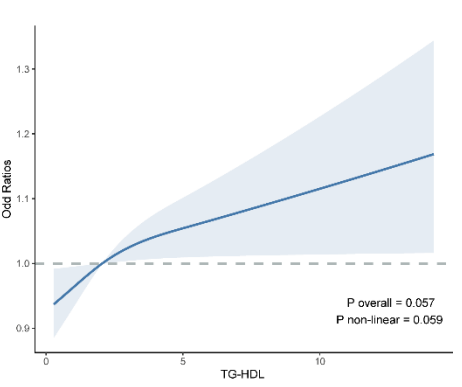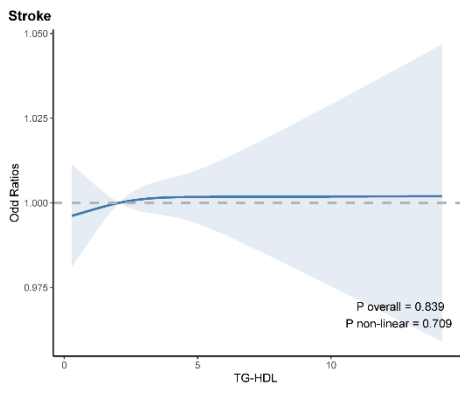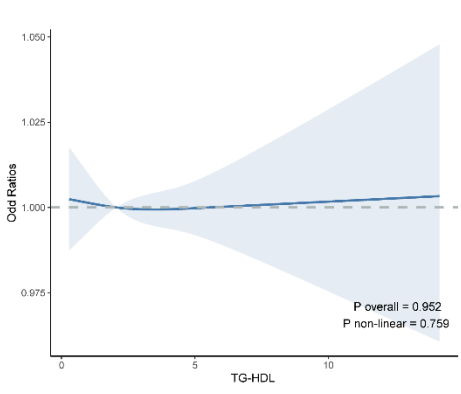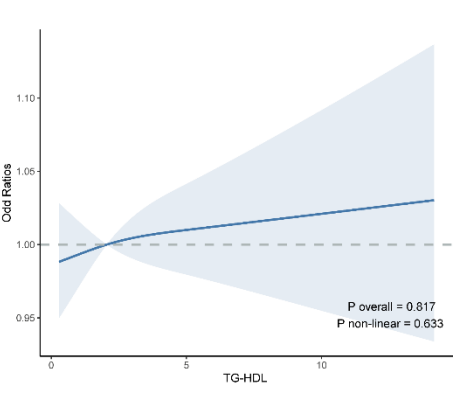

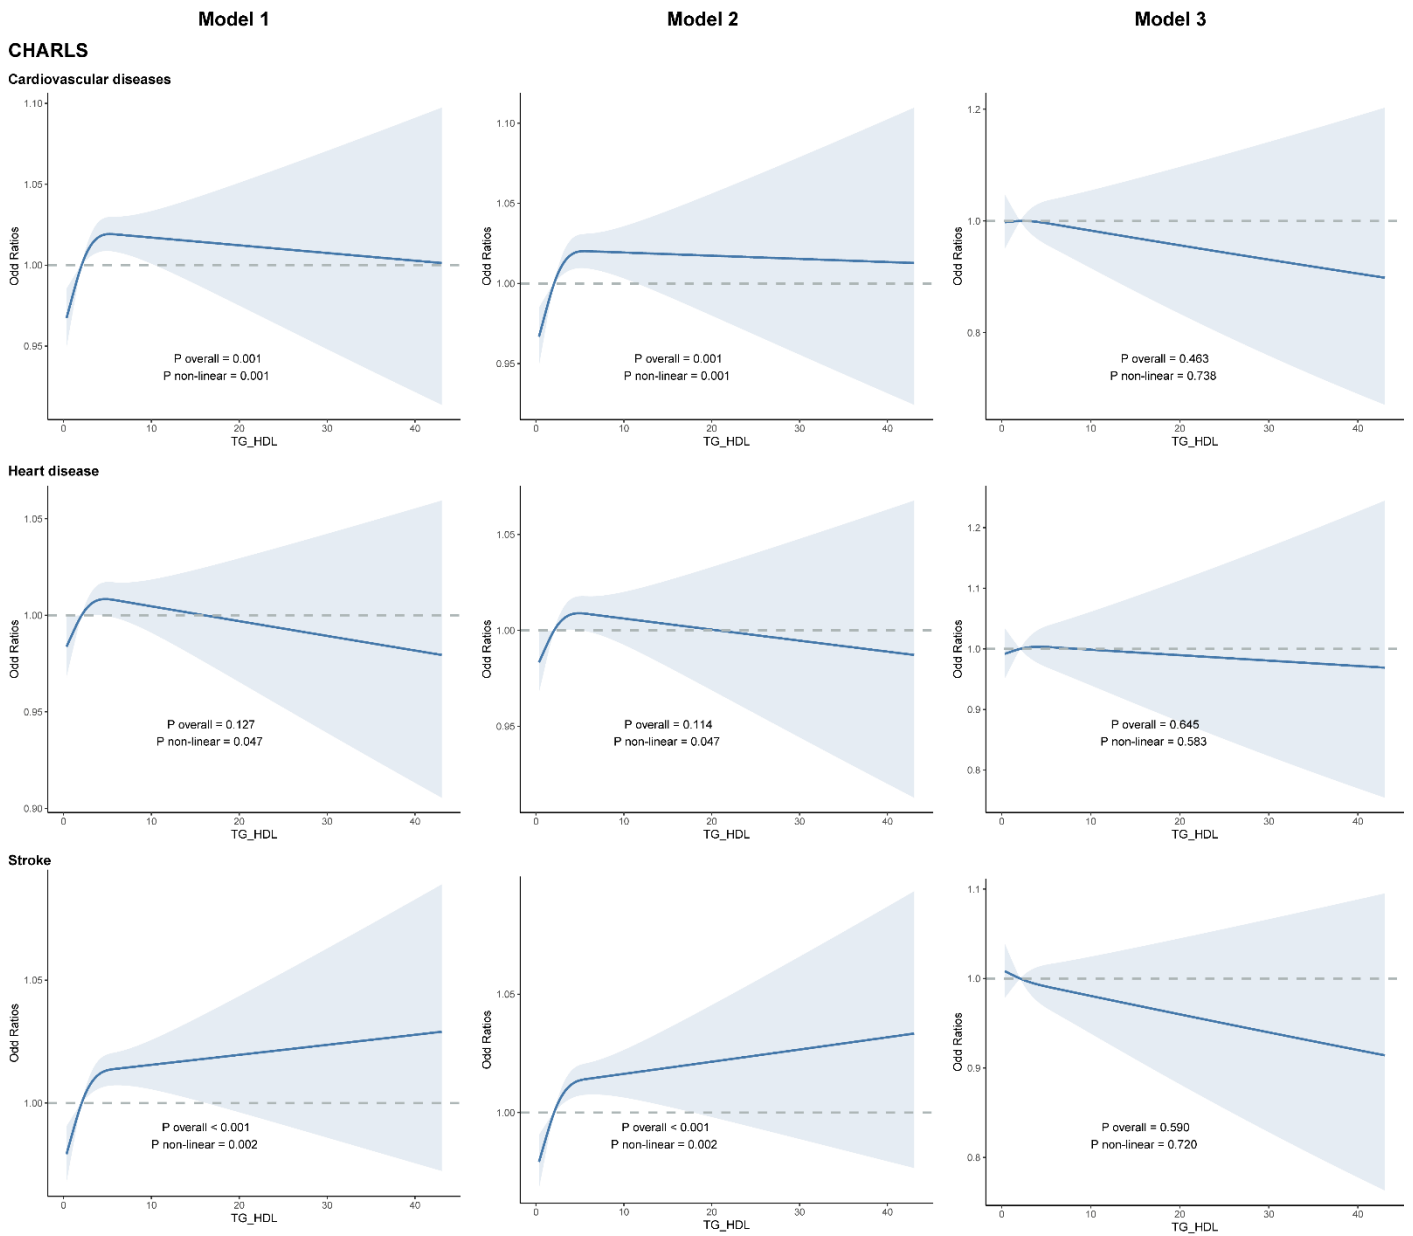

**Supplementary Figure 3** Restricted cubic spline curves for cardiovascular diseases, heart disease and stroke according to the TG/HDL-C from NHANES and CHARLS cohorts. Odds ratios are indicated by solid lines and 95% CIs by shaded areas. The horizontal dotted line represents the odd ratio of 1.0. Model 1 was an unadjusted model; model 2 adjusted for age, sex, marital status, education, smoking, and alcohol consumption status; model 3 was model 2 + further adjusted region, total cholesterol, high-density lipoprotein cholesterol, triglyceride, low-density lipoprotein cholesterol, blood urea nitrogen, uric acid, hemoglobin, and obesity.

Model 1

Model 2

Model 3

NHANES

Cardiovascular diseases

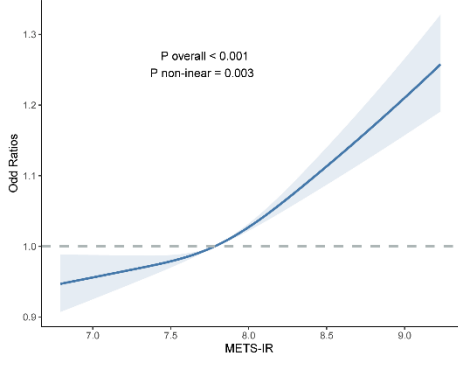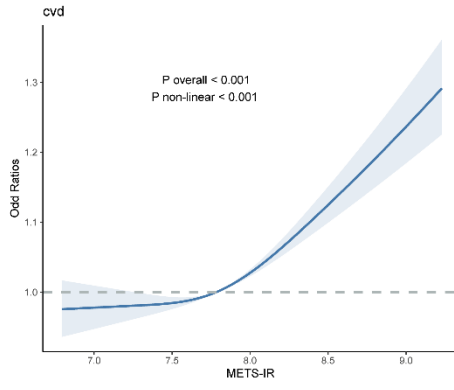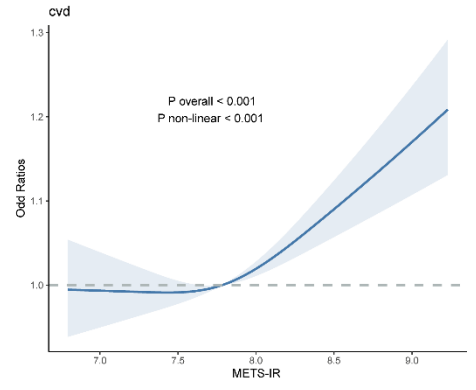

Heart disease

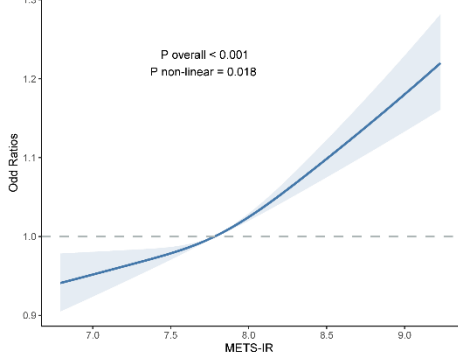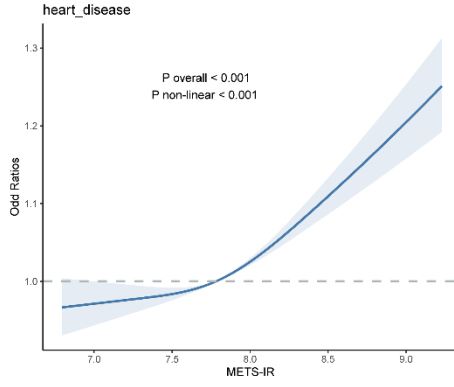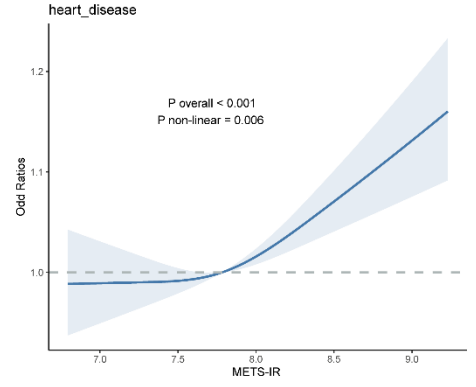

Stroke

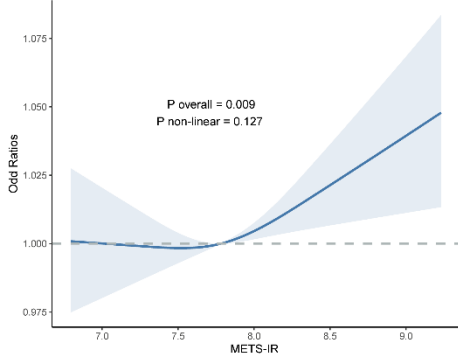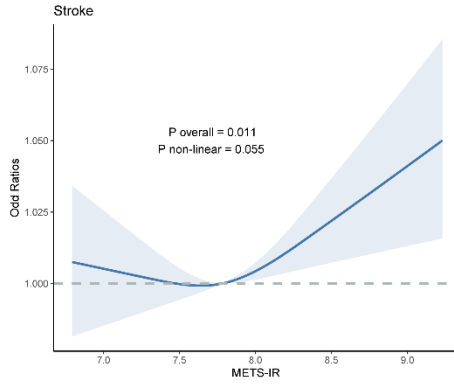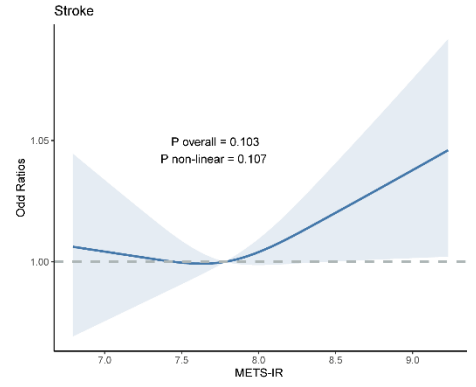



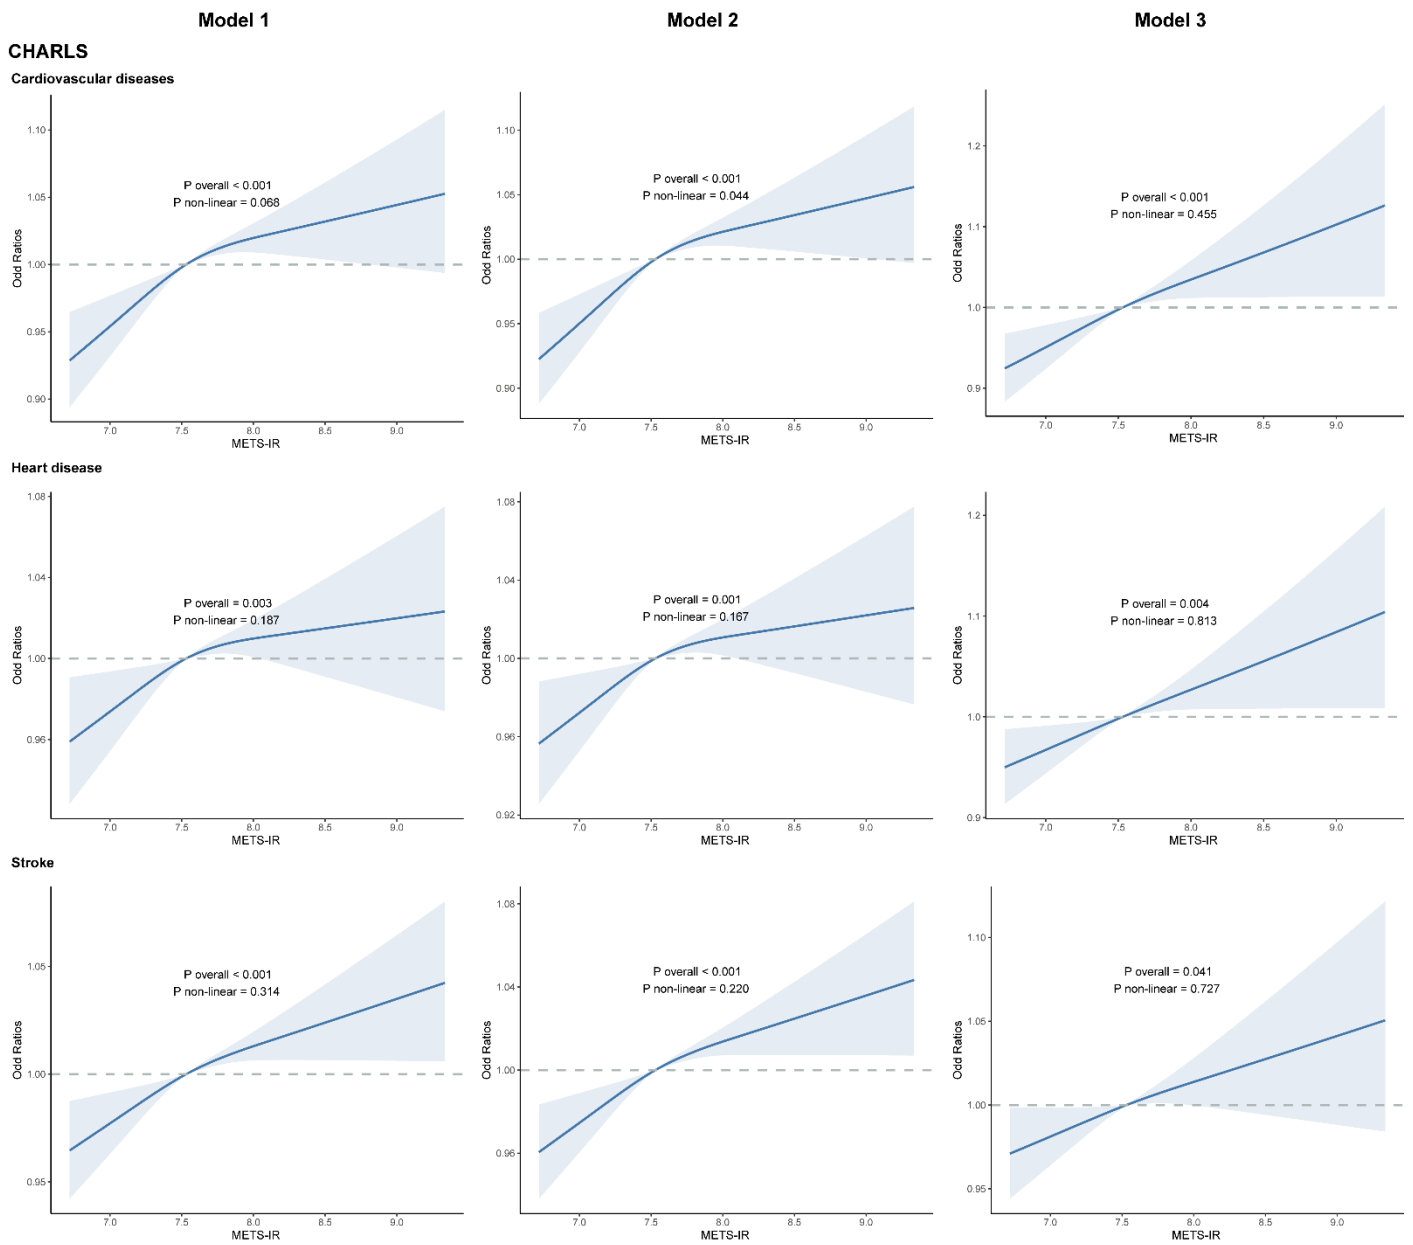

**Supplementary Figure 4** Restricted cubic spline curves for cardiovascular diseases, heart disease and stroke according to the METS-IR from NHANES and CHARLS cohorts. Odds ratios are indicated by solid lines and 95% CIs by shaded areas. The horizontal dotted line represents the odd ratio of 1.0. Model 1 was an unadjusted model; model 2 adjusted for age, sex, marital status, education, smoking, and alcohol consumption status; model 3 was model 2 + further adjusted region, total cholesterol, high-density lipoprotein cholesterol, triglyceride, low-density lipoprotein cholesterol, blood urea nitrogen, uric acid, hemoglobin, and obesity.

### A eGDR

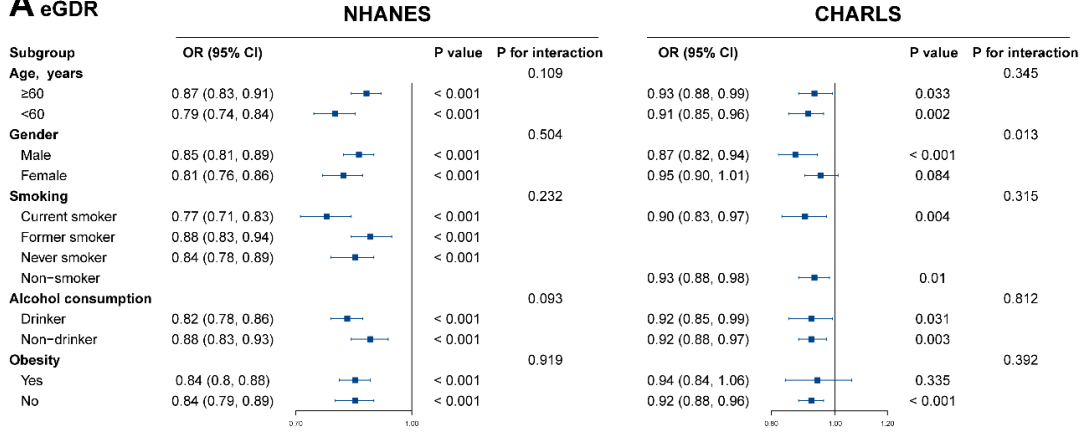

### B TyG

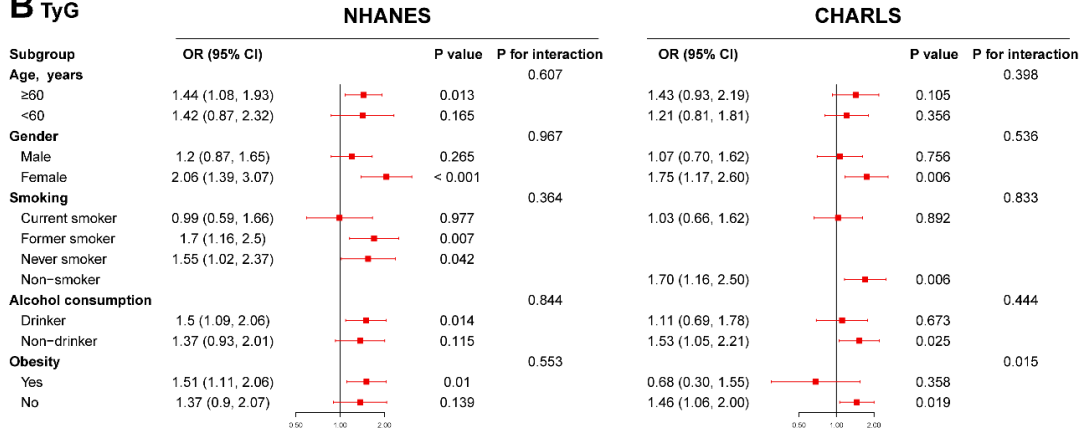

### C TG-HDL

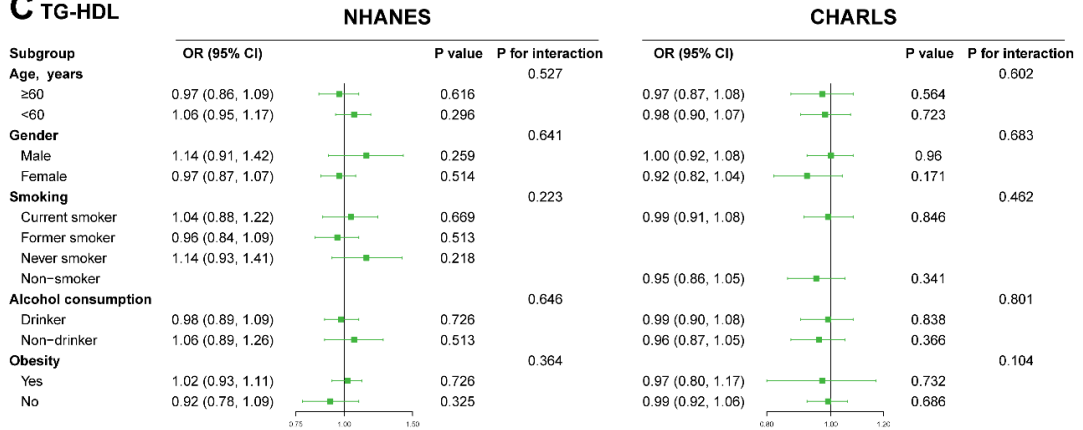

### D METS-IR

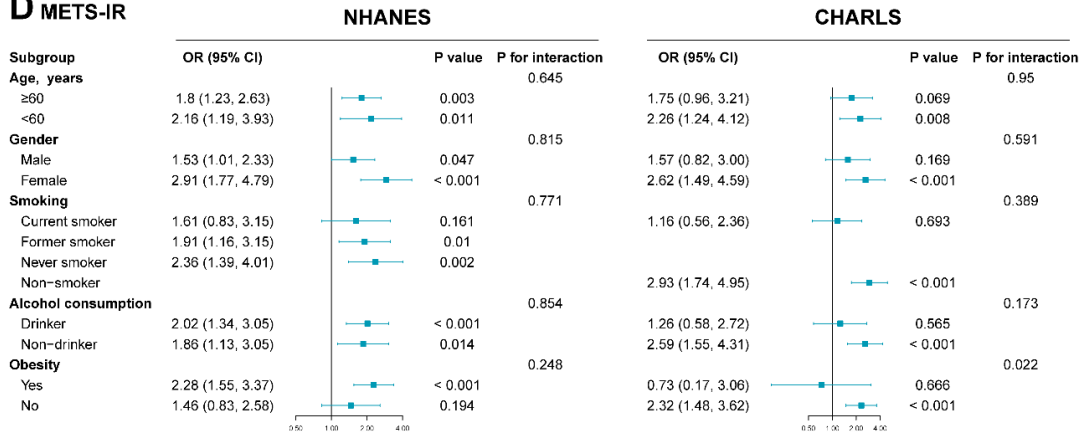

**Supplementary Figure 5** Subgroup analysis of the association between (A) eGDR, (B) TyG, (C) TG-HDL, (D) METS-IR and heart disease. CHARLS, China Health and Retirement Longitudinal Study; CI, confidence interval; eGDR, estimated glucose disposal rate; TyG, triglyceride glucose; TG, triglyceride; HDL-C, high-density lipoprotein cholesterol; METS-IR, metabolic score for insulin resistance; NHANES, National Health and Nutrition Examination Survey; OR, odd ratio.

### A eGDR

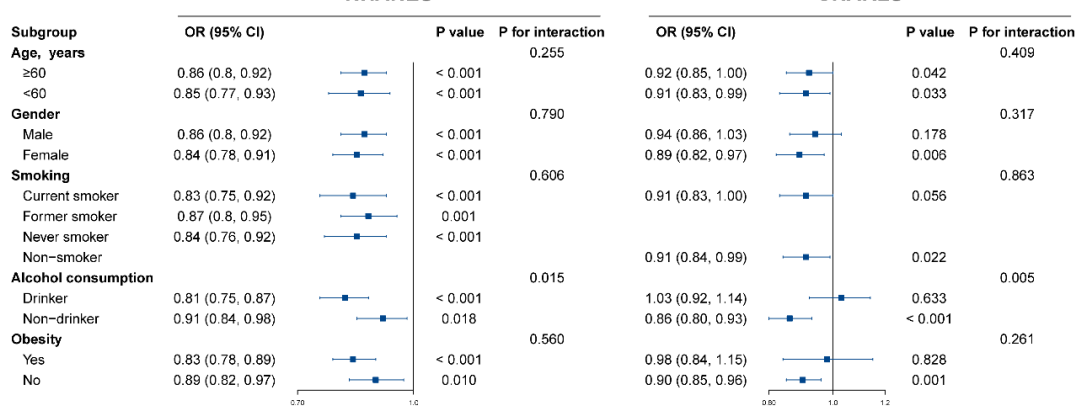

### B TyG

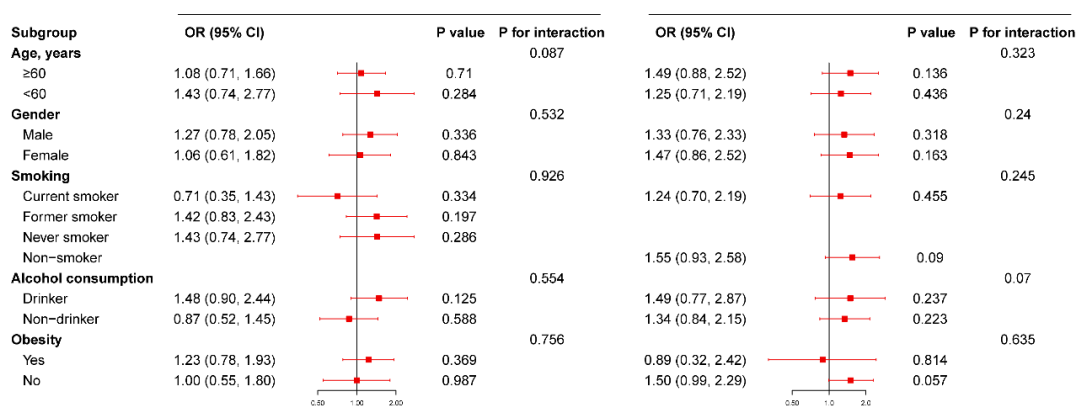

### C TG-HDL

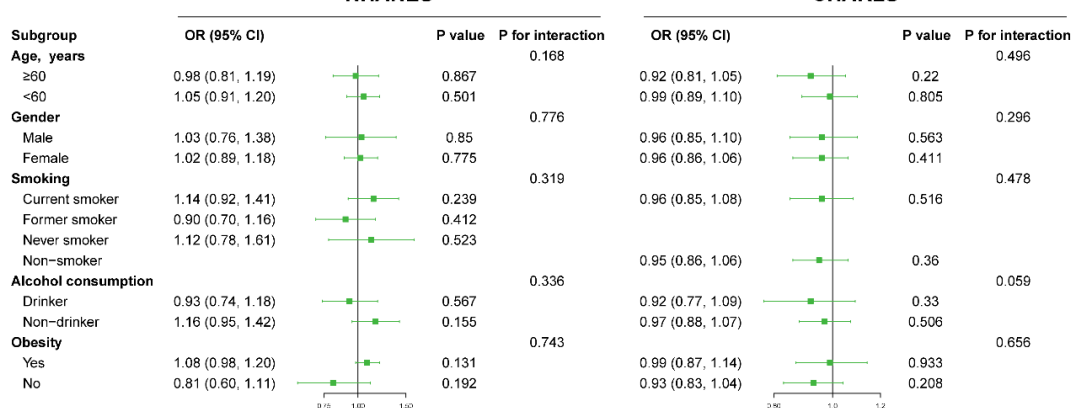

### D METS-IR

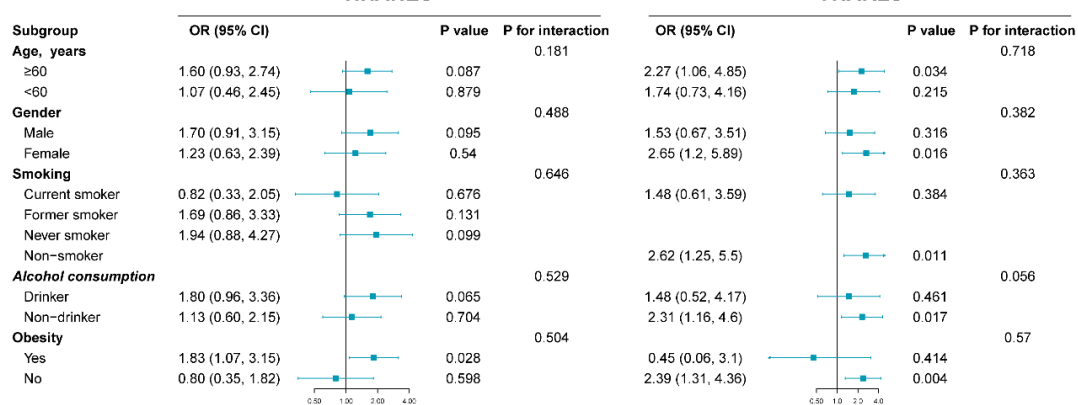

**Supplementary Figure 6** Subgroup analysis of the association between (A) eGDR, (B) TyG, (C) TG-HDL, (D) METS-IR and stroke. CHARLS, China Health and Retirement Longitudinal Study; CI, confidence interval; eGDR, estimated glucose disposal rate; TyG, triglyceride glucose; TG, triglyceride; HDL-C, high-density lipoprotein cholesterol; METS-IR, metabolic score for insulin resistance; NHANES, National Health and Nutrition Examination Survey; OR, odd ratio.

**NHANES**

**CHARLS**

| Subgroup                   | OR (95% CI)       | P value | P for interaction | OR (95% CI)       | P value | P for interaction |
|----------------------------|-------------------|---------|-------------------|-------------------|---------|-------------------|
| <b>Age, years</b>          |                   |         | 0.063             |                   |         | 0.454             |
| ≥60                        |                   |         |                   |                   |         |                   |
| Q1                         | Ref               | Ref     |                   | Ref               | Ref     |                   |
| Q2                         | 0.80 (0.64, 0.98) | 0.034   |                   | 0.74 (0.56, 0.99) | 0.044   |                   |
| Q3                         | 0.59 (0.46, 0.74) | < 0.001 |                   | 0.74 (0.53, 1.02) | 0.065   |                   |
| Q4                         | 0.39 (0.28, 0.53) | < 0.001 |                   | 0.63 (0.45, 0.89) | 0.008   |                   |
| <60                        |                   |         |                   |                   |         |                   |
| Q1                         | Ref               | Ref     |                   | Ref               | Ref     |                   |
| Q2                         | 0.71 (0.49, 1.01) | 0.059   |                   | 0.75 (0.56, 0.99) | 0.043   |                   |
| Q3                         | 0.36 (0.24, 0.53) | < 0.001 |                   | 0.57 (0.42, 0.78) | < 0.001 |                   |
| Q4                         | 0.18 (0.11, 0.30) | < 0.001 |                   | 0.55 (0.40, 0.76) | < 0.001 |                   |
| <b>Gender</b>              |                   |         | 0.818             |                   |         | 0.196             |
| <b>Male</b>                |                   |         |                   |                   |         |                   |
| Q1                         | Ref               | Ref     |                   | Ref               | Ref     |                   |
| Q2                         | 0.80 (0.63, 1.01) | 0.065   |                   | 0.65 (0.48, 0.89) | 0.007   |                   |
| Q3                         | 0.52 (0.40, 0.67) | < 0.001 |                   | 0.53 (0.38, 0.74) | < 0.001 |                   |
| Q4                         | 0.35 (0.25, 0.50) | < 0.001 |                   | 0.49 (0.35, 0.70) | < 0.001 |                   |
| <b>Female</b>              |                   |         |                   |                   |         |                   |
| Q1                         | Ref               | Ref     |                   | Ref               | Ref     |                   |
| Q2                         | 0.71 (0.54, 0.95) | 0.019   |                   | 0.81 (0.62, 1.06) | 0.123   |                   |
| Q3                         | 0.49 (0.35, 0.68) | < 0.001 |                   | 0.74 (0.55, 1.00) | 0.05    |                   |
| Q4                         | 0.24 (0.15, 0.37) | < 0.001 |                   | 0.66 (0.49, 0.91) | 0.01    |                   |
| <b>Smoking</b>             |                   |         | 0.363             |                   |         | 0.433             |
| <b>Current smoker</b>      |                   |         |                   |                   |         |                   |
| Q1                         | Ref               | Ref     |                   | Ref               | Ref     |                   |
| Q2                         | 0.67 (0.45, 1.01) | 0.058   |                   | 0.65 (0.46, 0.91) | 0.014   |                   |
| Q3                         | 0.45 (0.30, 0.69) | < 0.001 |                   | 0.53 (0.36, 0.77) | < 0.001 |                   |
| Q4                         | 0.17 (0.10, 0.30) | < 0.001 |                   | 0.56 (0.39, 0.81) | 0.002   |                   |
| <b>Former smoker</b>       |                   |         |                   |                   |         |                   |
| Q1                         | Ref               | Ref     |                   |                   |         |                   |
| Q2                         | 0.84 (0.63, 1.11) | 0.211   |                   |                   |         |                   |
| Q3                         | 0.63 (0.47, 0.85) | 0.003   |                   |                   |         |                   |
| Q4                         | 0.41 (0.26, 0.63) | < 0.001 |                   |                   |         |                   |
| <b>Never smoker</b>        |                   |         |                   |                   |         |                   |
| Q1                         | Ref               | Ref     |                   |                   |         |                   |
| Q2                         | 0.70 (0.51, 0.94) | 0.019   |                   |                   |         |                   |
| Q3                         | 0.39 (0.27, 0.56) | < 0.001 |                   |                   |         |                   |
| Q4                         | 0.32 (0.20, 0.50) | < 0.001 |                   |                   |         |                   |
| <b>Non-smoker</b>          |                   |         |                   |                   |         |                   |
| Q1                         |                   |         |                   | Ref               | Ref     |                   |
| Q2                         |                   |         |                   | 0.80 (0.62, 1.02) | 0.076   |                   |
| Q3                         |                   |         |                   | 0.71 (0.54, 0.94) | 0.015   |                   |
| Q4                         |                   |         |                   | 0.59 (0.44, 0.80) | < 0.001 |                   |
| <b>Alcohol consumption</b> |                   |         | 0.037             |                   |         | 0.352             |
| <b>Drinker</b>             |                   |         |                   |                   |         |                   |
| Q1                         | Ref               | Ref     |                   | Ref               | Ref     |                   |
| Q2                         | 0.64 (0.51, 0.81) | < 0.001 |                   | 0.96 (0.66, 1.38) | 0.82    |                   |
| Q3                         | 0.42 (0.32, 0.54) | < 0.001 |                   | 0.75 (0.50, 1.13) | 0.168   |                   |
| Q4                         | 0.24 (0.17, 0.34) | < 0.001 |                   | 0.74 (0.49, 1.12) | 0.15    |                   |
| <b>Non-drinker</b>         |                   |         |                   |                   |         |                   |
| Q1                         | Ref               | Ref     |                   | Ref               | Ref     |                   |
| Q2                         | 0.98 (0.73, 1.32) | 0.902   |                   | 0.67 (0.52, 0.85) | 0.001   |                   |
| Q3                         | 0.70 (0.50, 0.97) | 0.030   |                   | 0.60 (0.46, 0.78) | < 0.001 |                   |
| Q4                         | 0.44 (0.28, 0.69) | < 0.001 |                   | 0.54 (0.40, 0.71) | < 0.001 |                   |
| <b>Obesity</b>             |                   |         | 0.005             |                   |         | 0.996             |
| <b>Yes</b>                 |                   |         |                   |                   |         |                   |
| Q1                         | Ref               | Ref     |                   | Ref               | Ref     |                   |
| Q2                         | 0.83 (0.67, 1.03) | 0.091   |                   | 0.71 (0.44, 1.15) | 0.162   |                   |
| Q3                         | 0.39 (0.30, 0.50) | < 0.001 |                   | 0.71 (0.24, 2.15) | 0.55    |                   |
| Q4                         | 0.22 (0.11, 0.42) | < 0.001 |                   | 0.52 (0.12, 2.36) | 0.399   |                   |
| <b>No</b>                  |                   |         |                   |                   |         |                   |
| Q1                         | Ref               | Ref     |                   | Ref               | Ref     |                   |
| Q2                         | 0.98 (0.61, 1.56) | 0.927   |                   | 0.75 (0.60, 0.93) | 0.01    |                   |
| Q3                         | 0.85 (0.52, 1.37) | 0.495   |                   | 0.65 (0.51, 0.81) | < 0.001 |                   |
| Q4                         | 0.45 (0.28, 0.74) | 0.002   |                   | 0.59 (0.47, 0.76) | < 0.001 |                   |

NHANES

CHARLS

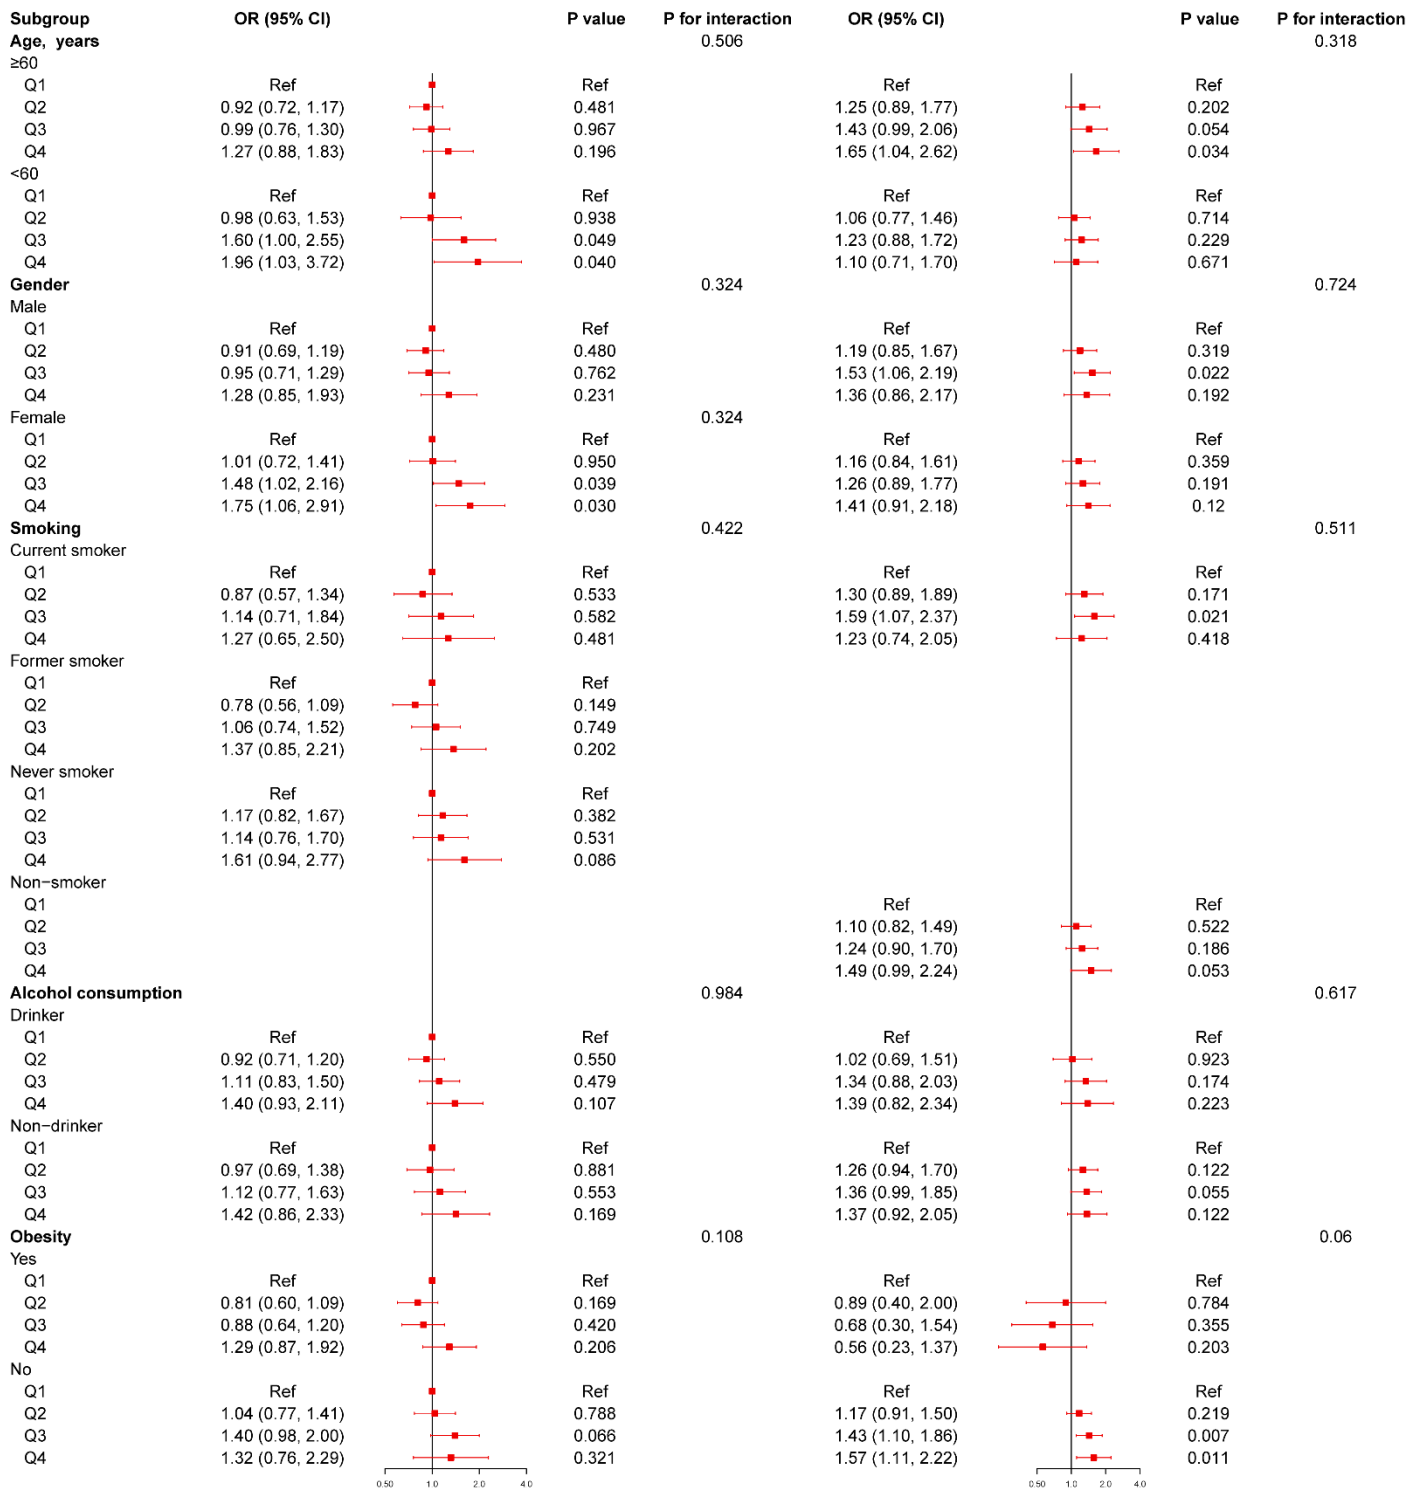

# CTG-HDL

## NHANES

## CHARLS

| Subgroup                   | OR (95% CI)       | P value | P for interaction | OR (95% CI)       | P value | P for interaction |
|----------------------------|-------------------|---------|-------------------|-------------------|---------|-------------------|
| <b>Age, years</b>          |                   |         | 0.76              |                   |         | 0.454             |
| ≥60                        |                   |         |                   |                   |         |                   |
| Q1                         | Ref               | Ref     |                   | Ref               | Ref     |                   |
| Q2                         | 1.16 (0.89, 1.52) | 0.275   |                   | 0.80 (0.55, 1.15) | 0.227   |                   |
| Q3                         | 1.10 (0.78, 1.53) | 0.589   |                   | 1.18 (0.79, 1.77) | 0.427   |                   |
| Q4                         | 1.41 (0.86, 2.30) | 0.168   |                   | 1.03 (0.59, 1.80) | 0.907   |                   |
| <60                        |                   |         |                   |                   |         |                   |
| Q1                         | Ref               | Ref     |                   | Ref               | Ref     |                   |
| Q2                         | 1.30 (0.82, 2.07) | 0.264   |                   | 1.03 (0.73, 1.46) | 0.857   |                   |
| Q3                         | 1.08 (0.62, 1.89) | 0.783   |                   | 1.17 (0.79, 1.74) | 0.443   |                   |
| Q4                         | 1.93 (0.90, 4.13) | 0.090   |                   | 1.09 (0.64, 1.85) | 0.759   |                   |
| <b>Gender</b>              |                   |         | 0.867             |                   |         | 0.715             |
| <b>Male</b>                |                   |         |                   |                   |         |                   |
| Q1                         | Ref               | Ref     |                   | Ref               | Ref     |                   |
| Q2                         | 1.22 (0.89, 1.66) | 0.214   |                   | 1.06 (0.72, 1.56) | 0.779   |                   |
| Q3                         | 1.16 (0.80, 1.67) | 0.442   |                   | 1.59 (1.04, 2.44) | 0.032   |                   |
| Q4                         | 1.57 (0.94, 2.63) | 0.082   |                   | 1.40 (0.79, 2.46) | 0.245   |                   |
| <b>Female</b>              |                   |         |                   |                   |         |                   |
| Q1                         | Ref               | Ref     |                   | Ref               | Ref     |                   |
| Q2                         | 1.21 (0.85, 1.73) | 0.284   |                   | 0.84 (0.60, 1.17) | 0.298   |                   |
| Q3                         | 1.10 (0.69, 1.75) | 0.702   |                   | 0.98 (0.67, 1.43) | 0.909   |                   |
| Q4                         | 1.53 (0.76, 3.09) | 0.237   |                   | 0.89 (0.53, 1.50) | 0.671   |                   |
| <b>Smoking</b>             |                   |         | 0.233             |                   |         | 0.341             |
| <b>Current smoker</b>      |                   |         |                   |                   |         |                   |
| Q1                         | Ref               | Ref     |                   | Ref               | Ref     |                   |
| Q2                         | 1.64 (1.01, 2.69) | 0.047   |                   | 1.35 (0.89, 2.04) | 0.164   |                   |
| Q3                         | 1.50 (0.84, 2.67) | 0.168   |                   | 1.63 (1.02, 2.61) | 0.039   |                   |
| Q4                         | 3.07 (1.38, 6.85) | 0.006   |                   | 1.39 (0.75, 2.56) | 0.294   |                   |
| <b>Former smoker</b>       |                   |         |                   |                   |         |                   |
| Q1                         | Ref               | Ref     |                   |                   |         |                   |
| Q2                         | 1.09 (0.75, 1.57) | 0.648   |                   |                   |         |                   |
| Q3                         | 1.27 (0.81, 1.99) | 0.289   |                   |                   |         |                   |
| Q4                         | 1.41 (0.74, 2.68) | 0.296   |                   |                   |         |                   |
| <b>Never smoker</b>        |                   |         |                   |                   |         |                   |
| Q1                         | Ref               | Ref     |                   |                   |         |                   |
| Q2                         | 1.02 (0.70, 1.49) | 0.919   |                   |                   |         |                   |
| Q3                         | 0.70 (0.42, 1.14) | 0.153   |                   |                   |         |                   |
| Q4                         | 0.96 (0.47, 1.98) | 0.920   |                   |                   |         |                   |
| <b>Non-smoker</b>          |                   |         |                   |                   |         |                   |
| Q1                         |                   |         |                   | Ref               | Ref     |                   |
| Q2                         |                   |         |                   | 0.75 (0.55, 1.03) | 0.077   |                   |
| Q3                         |                   |         |                   | 1.03 (0.72, 1.47) | 0.887   |                   |
| Q4                         |                   |         |                   | 0.99 (0.60, 1.60) | 0.952   |                   |
| <b>Alcohol consumption</b> |                   |         | 0.55              |                   |         | 0.46              |
| <b>Drinker</b>             |                   |         |                   |                   |         |                   |
| Q1                         | Ref               | Ref     |                   | Ref               | Ref     |                   |
| Q2                         | 1.18 (0.89, 1.58) | 0.251   |                   | 1.01 (0.65, 1.58) | 0.949   |                   |
| Q3                         | 1.08 (0.75, 1.54) | 0.689   |                   | 1.77 (1.10, 2.85) | 0.019   |                   |
| Q4                         | 1.28 (0.76, 2.15) | 0.357   |                   | 1.47 (0.77, 2.80) | 0.244   |                   |
| <b>Non-drinker</b>         |                   |         |                   |                   |         |                   |
| Q1                         | Ref               | Ref     |                   | Ref               | Ref     |                   |
| Q2                         | 1.25 (0.85, 1.85) | 0.259   |                   | 0.87 (0.63, 1.18) | 0.361   |                   |
| Q3                         | 1.21 (0.75, 1.94) | 0.440   |                   | 0.96 (0.68, 1.37) | 0.83    |                   |
| Q4                         | 2.20 (1.12, 4.32) | 0.022   |                   | 0.88 (0.55, 1.42) | 0.598   |                   |
| <b>Obesity</b>             |                   |         | 0.766             |                   |         | 0.378             |
| <b>Yes</b>                 |                   |         |                   |                   |         |                   |
| Q1                         | Ref               | Ref     |                   | Ref               | Ref     |                   |
| Q2                         | 1.05 (0.76, 1.46) | 0.748   |                   | 0.85 (0.33, 2.25) | 0.75    |                   |
| Q3                         | 0.87 (0.59, 1.27) | 0.467   |                   | 0.61 (0.23, 1.68) | 0.341   |                   |
| Q4                         | 1.18 (0.70, 1.99) | 0.536   |                   | 0.49 (0.15, 1.57) | 0.23    |                   |
| <b>No</b>                  |                   |         |                   |                   |         |                   |
| Q1                         | Ref               | Ref     |                   | Ref               | Ref     |                   |
| Q2                         | 1.38 (0.99, 1.93) | 0.060   |                   | 0.92 (0.70, 1.19) | 0.515   |                   |
| Q3                         | 1.51 (0.96, 2.36) | 0.073   |                   | 1.26 (0.94, 1.70) | 0.127   |                   |
| Q4                         | 2.11 (1.07, 4.18) | 0.031   |                   | 1.17 (0.77, 1.78) | 0.452   |                   |

0.50 1.0 2.0 4.0

0.50 1.0 2.0 4.0

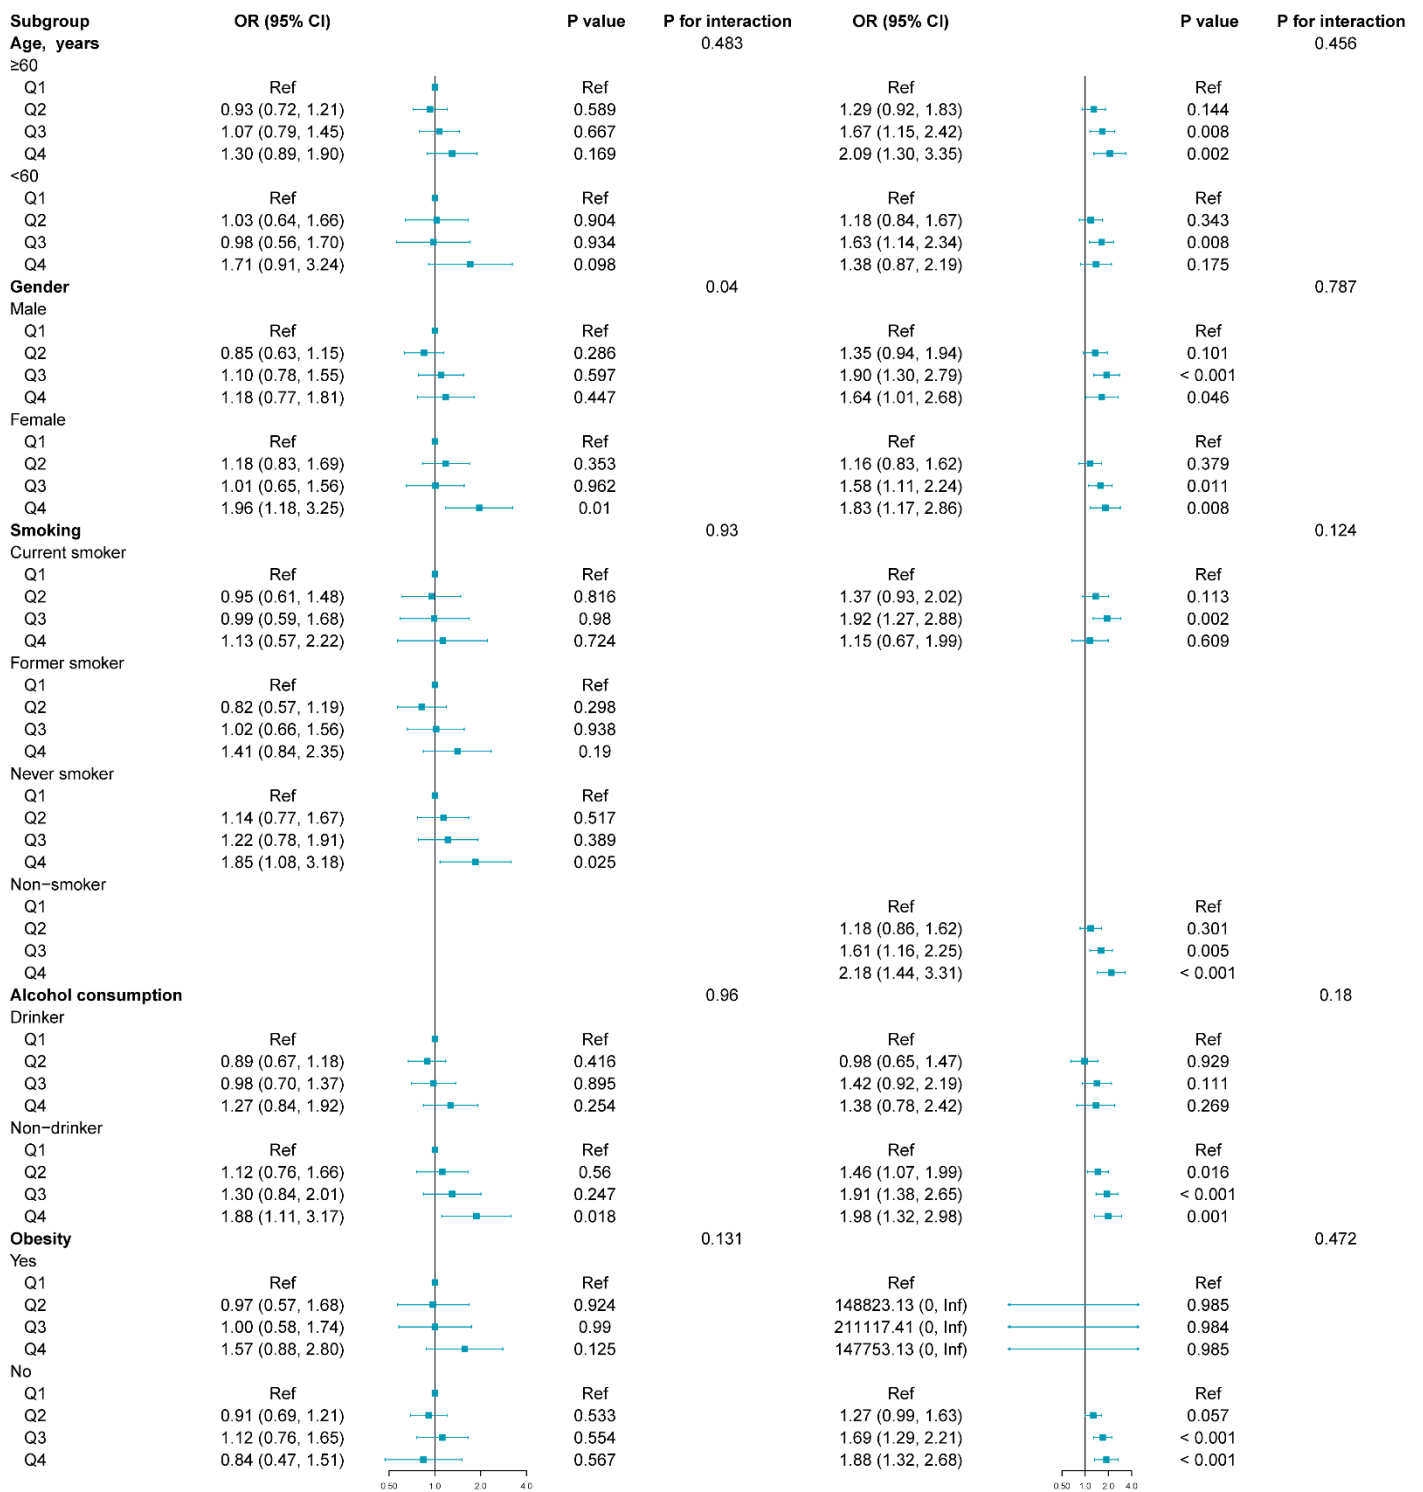

**Supplementary Figure 7** Subgroup and interaction analyses among the quartile 1–4 and cardiovascular diseases across various subgroups. (A) eGDR, (B) TyG, (C) TG-HDL, (D) METS-IR. eGDR, estimated glucose disposal rate. CHARLS, China Health and Retirement Longitudinal Study; CI, confidence interval; eGDR, estimated glucose disposal rate; TyG, triglyceride glucose; TG, triglyceride; HDL-C, high-density lipoprotein cholesterol; METS-IR, metabolic score for insulin resistance; NHANES, National Health and Nutrition Examination Survey; OR, odd ratio.

**NHANES**

**CHARLS**

| Subgroup                   | OR (95% CI)       | P value | P for interaction | OR (95% CI)       | P value | P for interaction |
|----------------------------|-------------------|---------|-------------------|-------------------|---------|-------------------|
| <b>Age, years</b>          |                   |         | 0.067             |                   |         | 0.346             |
| ≥60                        |                   |         |                   |                   |         |                   |
| Q1                         | Ref               | Ref     |                   | Ref               | Ref     |                   |
| Q2                         | 0.88 (0.70, 1.10) | 0.249   |                   | 0.91 (0.65, 1.27) | 0.576   |                   |
| Q3                         | 0.64 (0.50, 0.83) | < 0.001 |                   | 0.78 (0.53, 1.14) | 0.202   |                   |
| Q4                         | 0.44 (0.31, 0.63) | < 0.001 |                   | 0.65 (0.43, 0.97) | 0.035   |                   |
| <60                        |                   |         |                   |                   |         |                   |
| Q1                         | Ref               | Ref     |                   | Ref               | Ref     |                   |
| Q2                         | 0.67 (0.45, 1.01) | 0.058   |                   | 0.64 (0.46, 0.90) | 0.009   |                   |
| Q3                         | 0.32 (0.20, 0.50) | < 0.001 |                   | 0.57 (0.40, 0.81) | 0.002   |                   |
| Q4                         | 0.16 (0.09, 0.29) | < 0.001 |                   | 0.61 (0.42, 0.87) | 0.007   |                   |
| <b>Gender</b>              |                   |         | 0.912             |                   |         | 0.003             |
| <b>Male</b>                |                   |         |                   |                   |         |                   |
| Q1                         | Ref               | Ref     |                   | Ref               | Ref     |                   |
| Q2                         | 0.84 (0.65, 1.08) | 0.173   |                   | 0.59 (0.41, 0.86) | 0.005   |                   |
| Q3                         | 0.54 (0.41, 0.71) | < 0.001 |                   | 0.38 (0.25, 0.59) | < 0.001 |                   |
| Q4                         | 0.37 (0.26, 0.55) | < 0.001 |                   | 0.47 (0.31, 0.71) | < 0.001 |                   |
| <b>Female</b>              |                   |         |                   |                   |         |                   |
| Q1                         | Ref               | Ref     |                   | Ref               | Ref     |                   |
| Q2                         | 0.75 (0.54, 1.03) | 0.075   |                   | 0.89 (0.66, 1.21) | 0.455   |                   |
| Q3                         | 0.50 (0.34, 0.73) | < 0.001 |                   | 0.92 (0.66, 1.28) | 0.617   |                   |
| Q4                         | 0.26 (0.16, 0.44) | < 0.001 |                   | 0.77 (0.54, 1.10) | 0.149   |                   |
| <b>Smoking</b>             |                   |         | 0.364             |                   |         | 0.072             |
| <b>Current smoker</b>      |                   |         |                   |                   |         |                   |
| Q1                         | Ref               | Ref     |                   | Ref               | Ref     |                   |
| Q2                         | 0.76 (0.49, 1.18) | 0.216   |                   | 0.64 (0.42, 0.97) | 0.037   |                   |
| Q3                         | 0.42 (0.26, 0.68) | < 0.001 |                   | 0.43 (0.27, 0.70) | < 0.001 |                   |
| Q4                         | 0.19 (0.10, 0.36) | < 0.001 |                   | 0.64 (0.42, 1.00) | 0.048   |                   |
| <b>Former smoker</b>       |                   |         |                   |                   |         |                   |
| Q1                         | Ref               | Ref     |                   |                   |         |                   |
| Q2                         | 0.81 (0.60, 1.10) | 0.173   |                   |                   |         |                   |
| Q3                         | 0.70 (0.50, 0.96) | 0.028   |                   |                   |         |                   |
| Q4                         | 0.41 (0.25, 0.68) | < 0.001 |                   |                   |         |                   |
| <b>Never smoker</b>        |                   |         |                   |                   |         |                   |
| Q1                         | Ref               | Ref     |                   |                   |         |                   |
| Q2                         | 0.80 (0.57, 1.11) | 0.182   |                   |                   |         |                   |
| Q3                         | 0.42 (0.28, 0.64) | < 0.001 |                   |                   |         |                   |
| Q4                         | 0.37 (0.22, 0.60) | < 0.001 |                   |                   |         |                   |
| <b>Non-smoker</b>          |                   |         |                   |                   |         |                   |
| Q1                         |                   |         |                   | Ref               | Ref     |                   |
| Q2                         |                   |         |                   | 0.82 (0.62, 1.10) | 0.184   |                   |
| Q3                         |                   |         |                   | 0.79 (0.58, 1.08) | 0.134   |                   |
| Q4                         |                   |         |                   | 0.61 (0.44, 0.87) | 0.006   |                   |
| <b>Alcohol consumption</b> |                   |         | 0.246             |                   |         | 0.341             |
| <b>Drinker</b>             |                   |         |                   |                   |         |                   |
| Q1                         | Ref               | Ref     |                   | Ref               | Ref     |                   |
| Q2                         | 0.69 (0.54, 0.89) | 0.004   |                   | 0.76 (0.5, 1.16)  | 0.207   |                   |
| Q3                         | 0.46 (0.35, 0.61) | < 0.001 |                   | 0.49 (0.3, 0.80)  | 0.004   |                   |
| Q4                         | 0.26 (0.18, 0.38) | < 0.001 |                   | 0.64 (0.4, 1.01)  | 0.055   |                   |
| <b>Non-drinker</b>         |                   |         |                   |                   |         |                   |
| Q1                         | Ref               | Ref     |                   | Ref               | Ref     |                   |
| Q2                         | 1.01 (0.74, 1.39) | 0.936   |                   | 0.76 (0.57, 1.01) | 0.058   |                   |
| Q3                         | 0.69 (0.48, 0.99) | 0.044   |                   | 0.75 (0.55, 1.02) | 0.063   |                   |
| Q4                         | 0.49 (0.30, 0.82) | 0.006   |                   | 0.64 (0.46, 0.90) | 0.009   |                   |
| <b>Obesity</b>             |                   |         | 0.007             |                   |         | 0.808             |
| <b>Yes</b>                 |                   |         |                   |                   |         |                   |
| Q1                         | Ref               | Ref     |                   | Ref               | Ref     |                   |
| Q2                         | 0.92 (0.73, 1.16) | 0.487   |                   | 0.70 (0.39, 1.23) | 0.214   |                   |
| Q3                         | 0.40 (0.30, 0.54) | < 0.001 |                   | 1.04 (0.34, 3.18) | 0.949   |                   |
| Q4                         | 0.27 (0.13, 0.56) | < 0.001 |                   | 0.83 (0.18, 3.79) | 0.81    |                   |
| <b>No</b>                  |                   |         |                   |                   |         |                   |
| Q1                         | Ref               | Ref     |                   | Ref               | Ref     |                   |
| Q2                         | 0.85 (0.53, 1.38) | 0.521   |                   | 0.76 (0.59, 0.99) | 0.042   |                   |
| Q3                         | 0.75 (0.45, 1.24) | 0.263   |                   | 0.66 (0.5, 0.86)  | 0.002   |                   |
| Q4                         | 0.40 (0.24, 0.67) | < 0.001 |                   | 0.64 (0.48, 0.85) | 0.002   |                   |



NHANES

CHARLS

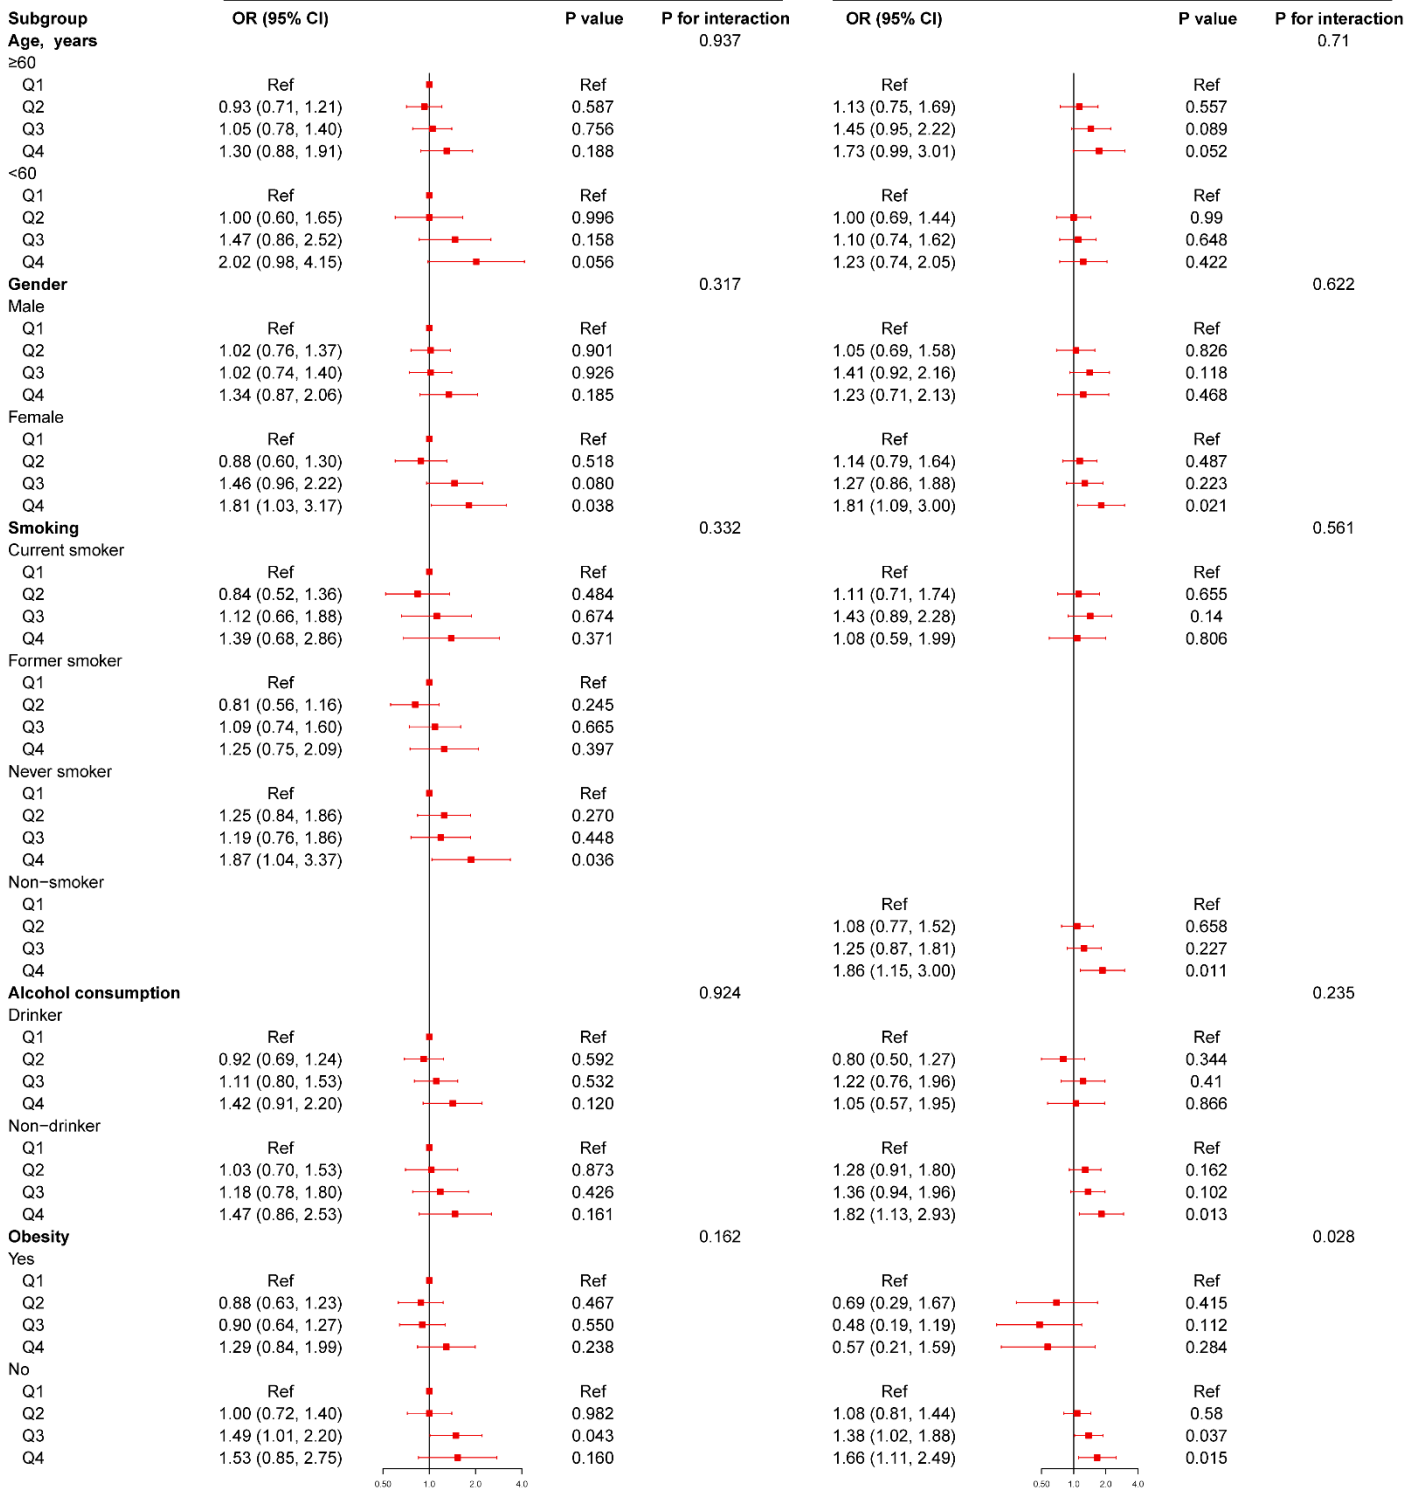

NHANES

CHARLS

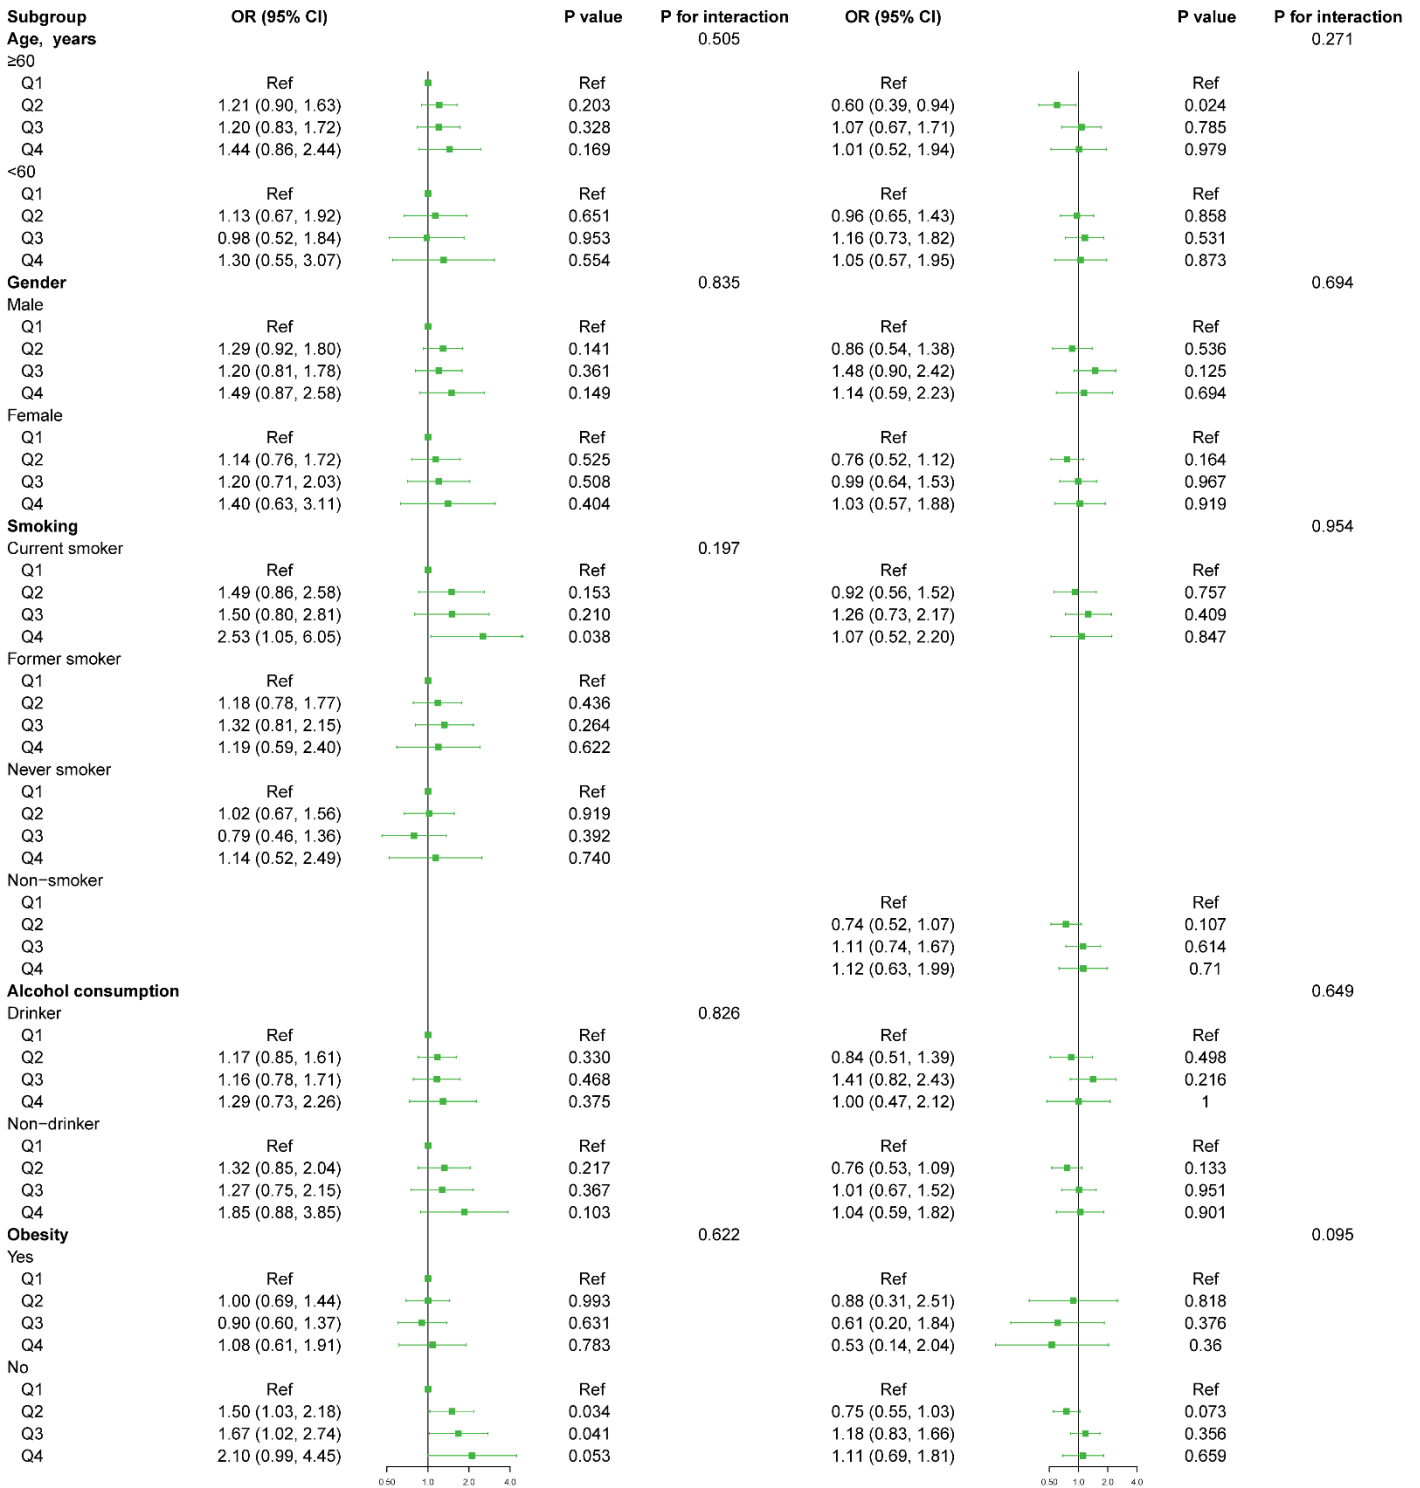

# D METS-IR

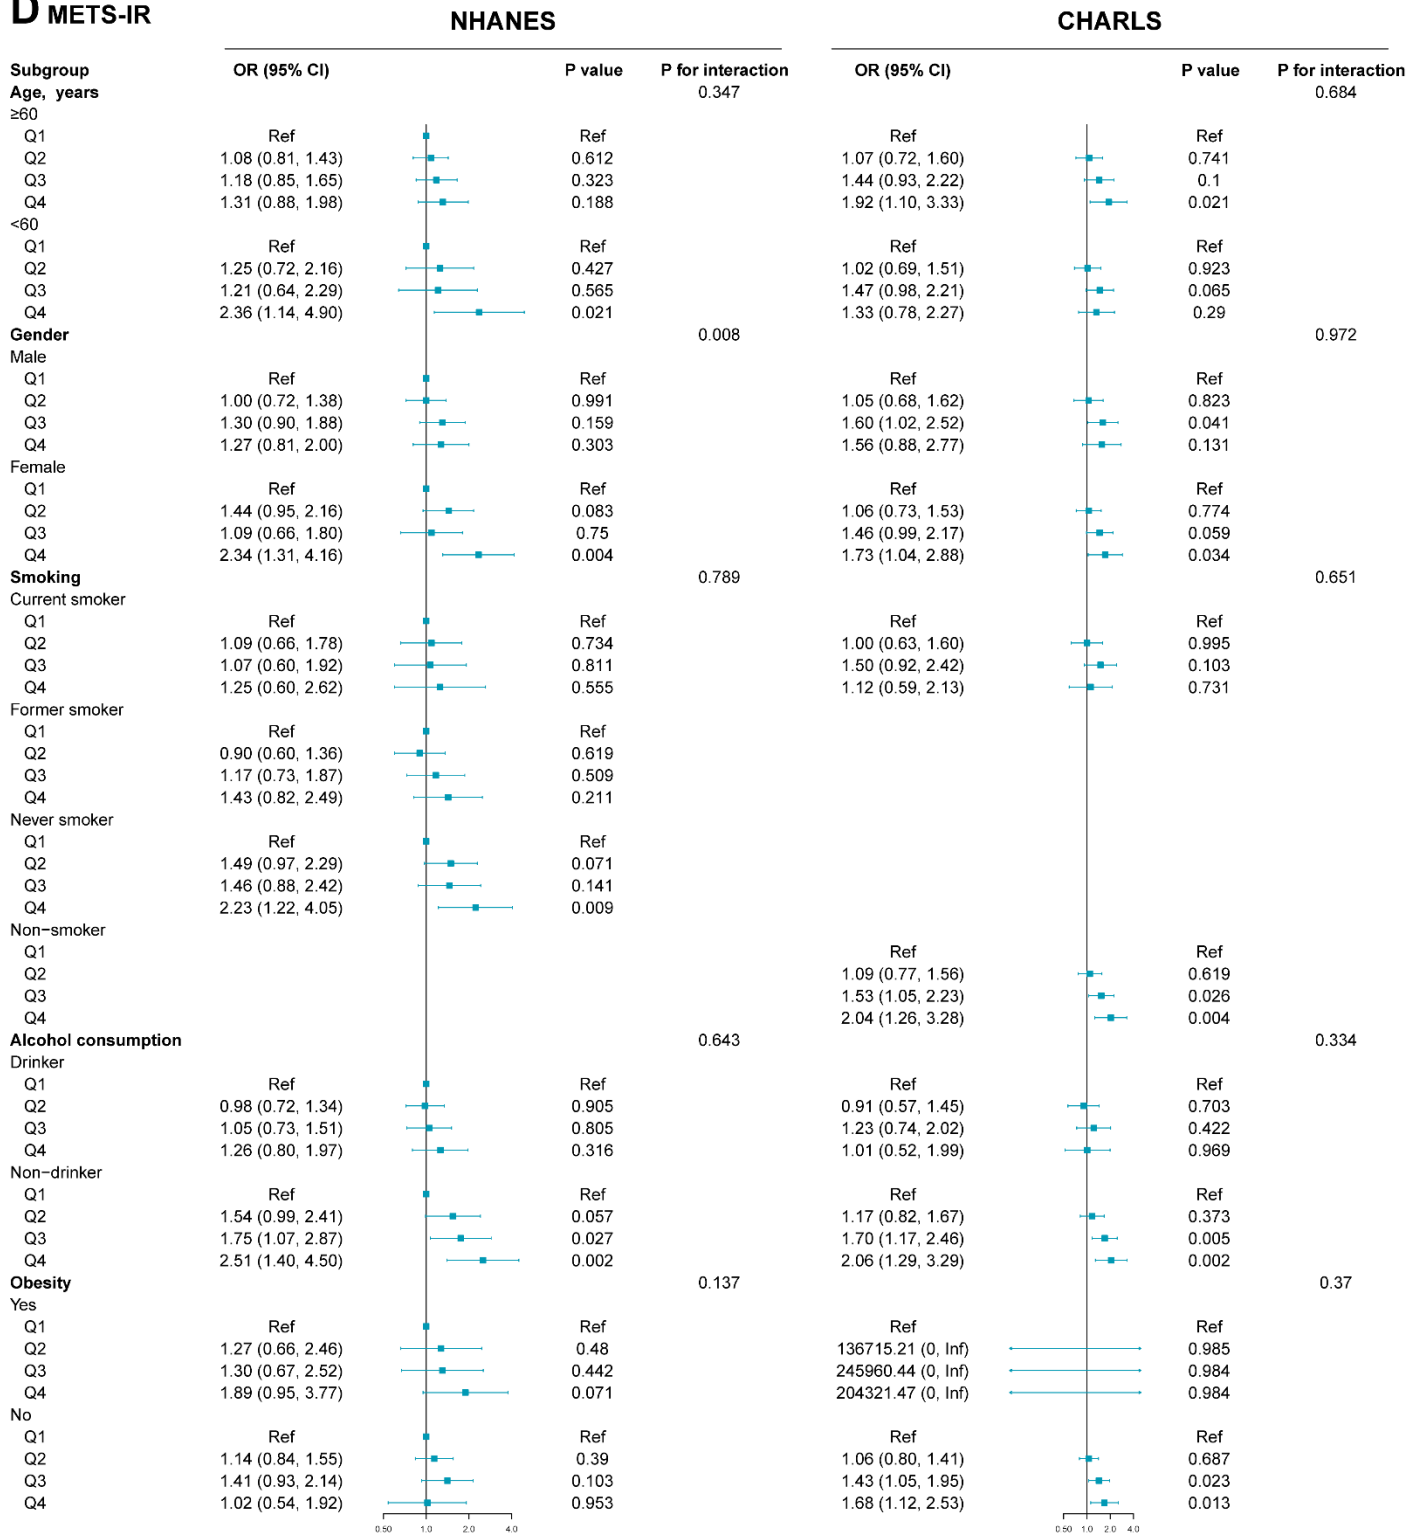

**Supplementary Figure 8** Subgroup and interaction analyses among the quartile 1–4 and heart disease across various subgroups. (A) eGDR, (B) TyG, (C) TG-HDL, (D) METS-IR. eGDR, estimated glucose disposal rate. CHARLS, China Health and Retirement Longitudinal Study; CI, confidence interval; eGDR, estimated glucose disposal rate; TyG, triglyceride glucose; TG, triglyceride; HDL-C, high-density lipoprotein cholesterol; METS-IR, metabolic score for insulin resistance; NHANES, National Health and Nutrition Examination Survey; OR, odd ratio.

**NHANES**

**CHARLS**

| Subgroup                   | OR (95% CI)       | P value | P for interaction | OR (95% CI)       | P value | P for interaction |
|----------------------------|-------------------|---------|-------------------|-------------------|---------|-------------------|
| <b>Age, years</b>          |                   |         |                   |                   |         |                   |
| ≥60                        |                   |         | 0.29              |                   |         | 0.056             |
| Q1                         | Ref               | Ref     |                   |                   |         |                   |
| Q2                         | 0.81 (0.59, 1.13) | 0.216   |                   | 0.54 (0.34, 0.87) | 0.011   |                   |
| Q3                         | 0.64 (0.44, 0.93) | 0.019   |                   | 0.76 (0.46, 1.23) | 0.262   |                   |
| Q4                         | 0.34 (0.20, 0.59) | < 0.001 |                   | 0.66 (0.40, 1.10) | 0.114   |                   |
| <60                        |                   |         |                   |                   |         |                   |
| Q1                         | Ref               | Ref     |                   |                   |         |                   |
| Q2                         | 0.70 (0.40, 1.21) | 0.201   |                   | 1.05 (0.67, 1.65) | 0.841   |                   |
| Q3                         | 0.47 (0.26, 0.84) | 0.01    |                   | 0.74 (0.45, 1.23) | 0.249   |                   |
| Q4                         | 0.18 (0.08, 0.41) | < 0.001 |                   | 0.52 (0.29, 0.95) | 0.032   |                   |
| <b>Gender</b>              |                   |         | 0.861             |                   |         | 0.372             |
| <b>Male</b>                |                   |         |                   |                   |         |                   |
| Q1                         | Ref               | Ref     |                   |                   |         |                   |
| Q2                         | 0.71 (0.48, 1.05) | 0.089   |                   | 0.92 (0.57, 1.49) | 0.731   |                   |
| Q3                         | 0.57 (0.38, 0.86) | 0.008   |                   | 0.99 (0.60, 1.65) | 0.983   |                   |
| Q4                         | 0.28 (0.15, 0.51) | < 0.001 |                   | 0.63 (0.35, 1.12) | 0.116   |                   |
| <b>Female</b>              |                   |         |                   |                   |         |                   |
| Q1                         | Ref               | Ref     |                   |                   |         |                   |
| Q2                         | 0.87 (0.58, 1.31) | 0.511   |                   | 0.67 (0.43, 1.03) | 0.067   |                   |
| Q3                         | 0.62 (0.39, 1.01) | 0.053   |                   | 0.55 (0.33, 0.93) | 0.024   |                   |
| Q4                         | 0.25 (0.13, 0.49) | < 0.001 |                   | 0.56 (0.33, 0.96) | 0.035   |                   |
| <b>Smoking</b>             |                   |         | 0.335             |                   |         | 0.782             |
| <b>Current smoker</b>      |                   |         |                   |                   |         |                   |
| Q1                         | Ref               | Ref     |                   |                   |         |                   |
| Q2                         | 0.58 (0.32, 1.04) | 0.067   |                   | 0.79 (0.47, 1.32) | 0.363   |                   |
| Q3                         | 0.65 (0.37, 1.15) | 0.141   |                   | 0.82 (0.48, 1.41) | 0.472   |                   |
| Q4                         | 0.16 (0.07, 0.40) | < 0.001 |                   | 0.50 (0.27, 0.93) | 0.027   |                   |
| <b>Former smoker</b>       |                   |         |                   |                   |         |                   |
| Q1                         | Ref               | Ref     |                   |                   |         |                   |
| Q2                         | 1.03 (0.68, 1.58) | 0.877   |                   |                   |         |                   |
| Q3                         | 0.61 (0.37, 0.99) | 0.046   |                   |                   |         |                   |
| Q4                         | 0.37 (0.17, 0.77) | 0.008   |                   |                   |         |                   |
| <b>Never smoker</b>        |                   |         |                   |                   |         |                   |
| Q1                         | Ref               | Ref     |                   |                   |         |                   |
| Q2                         | 0.61 (0.37, 1.00) | 0.052   |                   |                   |         |                   |
| Q3                         | 0.44 (0.24, 0.81) | 0.008   |                   |                   |         |                   |
| Q4                         | 0.28 (0.13, 0.59) | < 0.001 |                   |                   |         |                   |
| <b>Non-smoker</b>          |                   |         |                   |                   |         |                   |
| Q1                         |                   |         |                   |                   |         |                   |
| Q2                         |                   |         |                   | 0.74 (0.49, 1.12) | 0.152   |                   |
| Q3                         |                   |         |                   | 0.67 (0.42, 1.07) | 0.095   |                   |
| Q4                         |                   |         |                   | 0.65 (0.39, 1.08) | 0.096   |                   |
| <b>Alcohol consumption</b> |                   |         | 0.191             |                   |         | 0.002             |
| <b>Drinker</b>             |                   |         |                   |                   |         |                   |
| Q1                         | Ref               | Ref     |                   |                   |         |                   |
| Q2                         | 0.64 (0.43, 0.94) | 0.024   |                   | 1.75 (0.91, 3.35) | 0.091   |                   |
| Q3                         | 0.45 (0.29, 0.70) | < 0.001 |                   | 2.00 (1.00, 3.97) | 0.049   |                   |
| Q4                         | 0.19 (0.10, 0.36) | < 0.001 |                   | 1.12 (0.52, 2.42) | 0.764   |                   |
| <b>Non-drinker</b>         |                   |         |                   |                   |         |                   |
| Q1                         | Ref               | Ref     |                   |                   |         |                   |
| Q2                         | 0.96 (0.64, 1.43) | 0.835   |                   | 0.57 (0.38, 0.83) | 0.004   |                   |
| Q3                         | 0.79 (0.50, 1.23) | 0.295   |                   | 0.48 (0.31, 0.75) | 0.001   |                   |
| Q4                         | 0.41 (0.21, 0.80) | 0.009   |                   | 0.47 (0.30, 0.75) | 0.002   |                   |
| <b>Obesity</b>             |                   |         | 0.022             |                   |         | 0.289             |
| <b>Yes</b>                 |                   |         |                   |                   |         |                   |
| Q1                         | Ref               | Ref     |                   |                   |         |                   |
| Q2                         | 0.83 (0.60, 1.15) | 0.264   |                   | 0.98 (0.48, 2.01) | 0.951   |                   |
| Q3                         | 0.40 (0.26, 0.61) | < 0.001 |                   | 1.00 (0, Inf)     | 0.983   |                   |
| Q4                         | 0.11 (0.03, 0.45) | 0.002   |                   | 0.85 (0.10, 6.94) | 0.88    |                   |
| <b>No</b>                  |                   |         |                   |                   |         |                   |
| Q1                         | Ref               | Ref     |                   |                   |         |                   |
| Q2                         | 1.38 (0.63, 3.06) | 0.421   |                   | 0.71 (0.50, 1.02) | 0.063   |                   |
| Q3                         | 1.44 (0.65, 3.23) | 0.372   |                   | 0.73 (0.51, 1.05) | 0.093   |                   |
| Q4                         | 0.65 (0.27, 1.52) | 0.315   |                   | 0.56 (0.38, 0.84) | 0.005   |                   |

NHANES

CHARLS

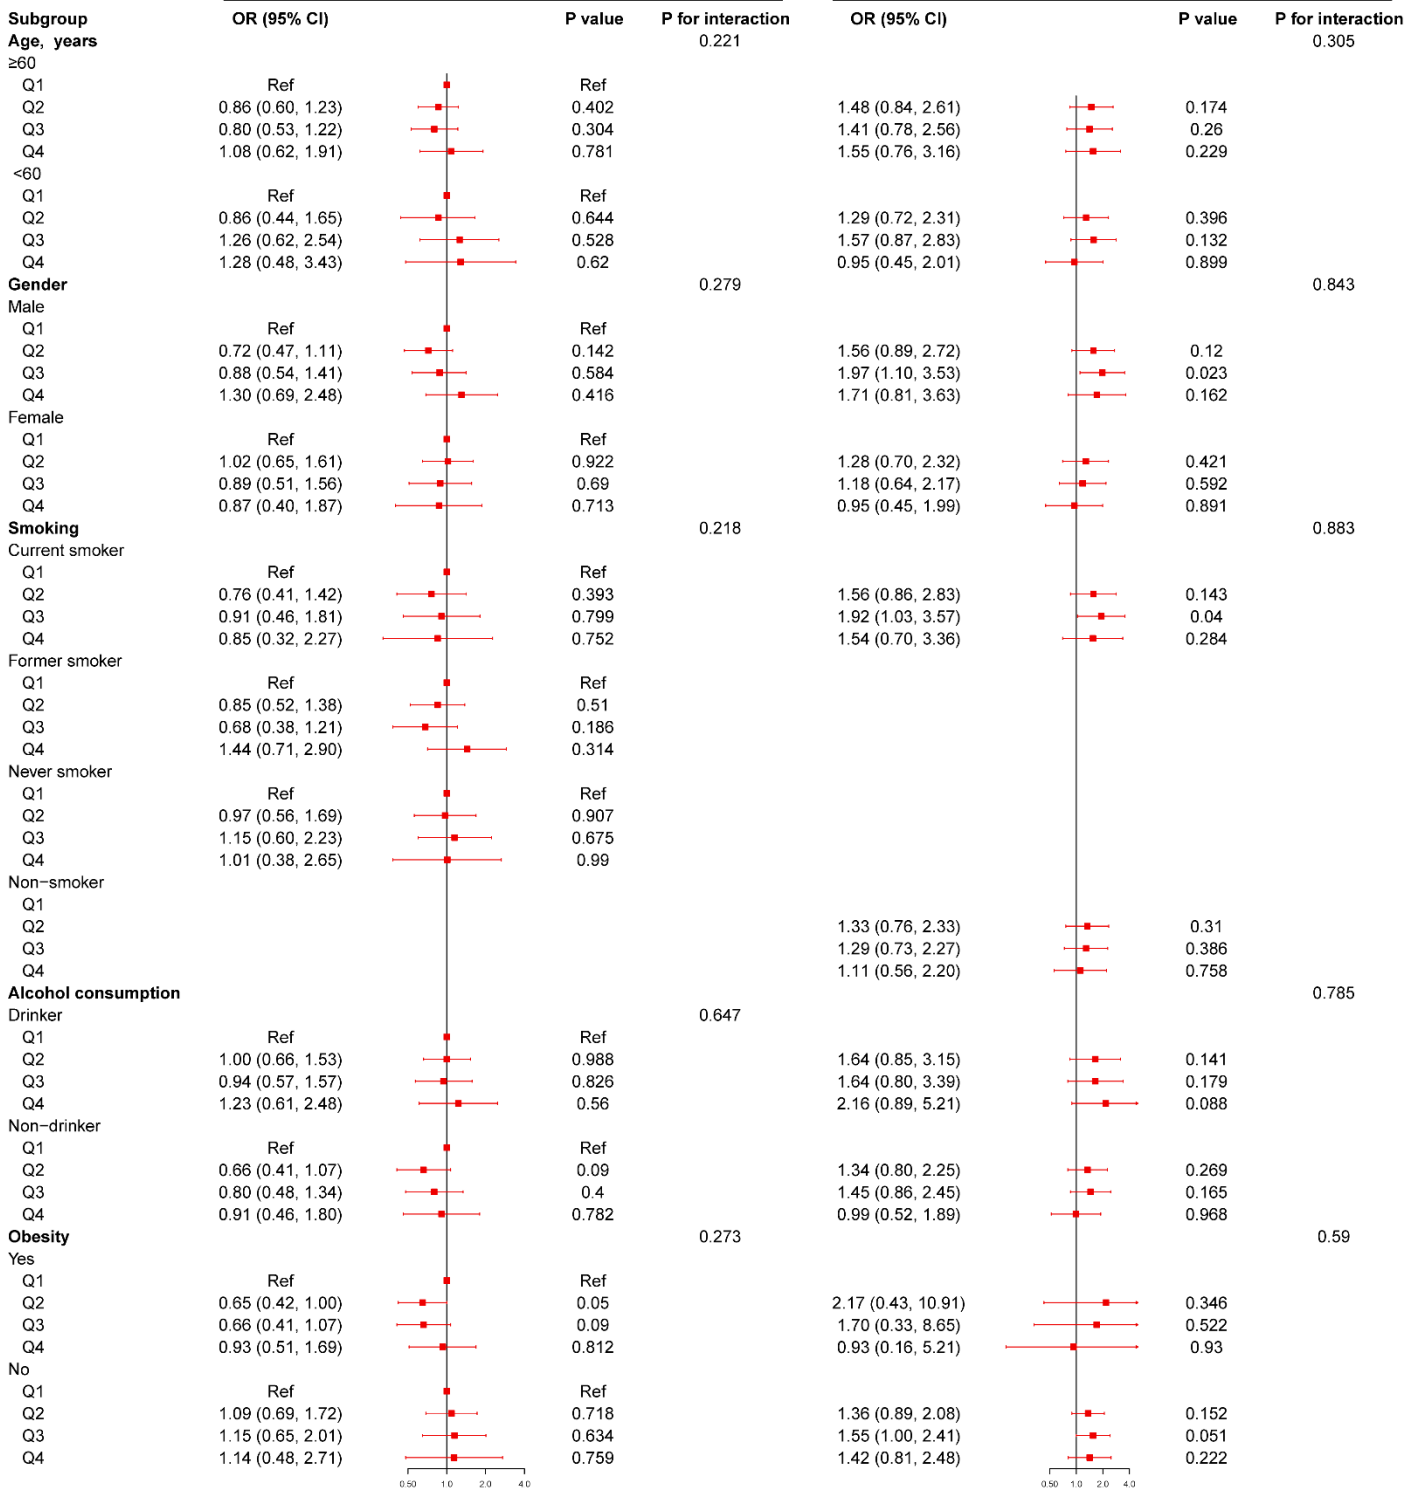

**NHANES**

**CHARLS**

| Subgroup            | OR (95% CI)       | P value | P for interaction | OR (95% CI)        | P value | P for interaction |
|---------------------|-------------------|---------|-------------------|--------------------|---------|-------------------|
| Age, years          |                   |         | 0.204             |                    |         | 0.98              |
| >=60                |                   |         |                   |                    |         |                   |
| Q1                  | Ref               | Ref     |                   | Ref                | Ref     |                   |
| Q2                  | 1.02 (0.68, 1.53) | 0.930   |                   | 1.55 (0.86, 2.79)  | 0.149   |                   |
| Q3                  | 1.10 (0.65, 1.84) | 0.727   |                   | 1.44 (0.74, 2.82)  | 0.285   |                   |
| Q4                  | 1.63 (0.76, 3.48) | 0.209   |                   | 1.31 (0.55, 3.10)  | 0.546   |                   |
| <60                 |                   |         |                   |                    |         |                   |
| Q1                  | Ref               | Ref     |                   | Ref                | Ref     |                   |
| Q2                  | 1.49 (0.73, 3.02) | 0.273   |                   | 1.53 (0.80, 2.90)  | 0.199   |                   |
| Q3                  | 1.05 (0.43, 2.56) | 0.914   |                   | 1.36 (0.66, 2.79)  | 0.407   |                   |
| Q4                  | 3.04 (0.94, 9.81) | 0.063   |                   | 1.29 (0.52, 3.18)  | 0.58    |                   |
| Gender              |                   |         | 0.136             |                    |         | 0.834             |
| Male                |                   |         |                   |                    |         |                   |
| Q1                  | Ref               | Ref     |                   | Ref                | Ref     |                   |
| Q2                  | 0.96 (0.58, 1.59) | 0.882   |                   | 2.05 (1.08, 3.89)  | 0.028   |                   |
| Q3                  | 1.28 (0.71, 2.30) | 0.413   |                   | 2.10 (1.01, 4.38)  | 0.046   |                   |
| Q4                  | 1.93 (0.84, 4.42) | 0.120   |                   | 2.46 (0.96, 6.27)  | 0.06    |                   |
| Female              |                   |         |                   |                    |         |                   |
| Q1                  | Ref               | Ref     |                   | Ref                | Ref     |                   |
| Q2                  | 1.23 (0.75, 2.02) | 0.417   |                   | 1.15 (0.63, 2.09)  | 0.642   |                   |
| Q3                  | 0.78 (0.39, 1.56) | 0.482   |                   | 1.00 (0.51, 1.97)  | 0.99    |                   |
| Q4                  | 1.65 (0.60, 4.50) | 0.329   |                   | 0.76 (0.32, 1.82)  | 0.542   |                   |
| Smoking             |                   |         | 0.211             |                    |         | 0.192             |
| Current smoker      |                   |         |                   |                    |         |                   |
| Q1                  | Ref               | Ref     |                   | Ref                | Ref     |                   |
| Q2                  | 1.40 (0.70, 2.80) | 0.347   |                   | 3.04 (1.50, 6.16)  | 0.002   |                   |
| Q3                  | 0.96 (0.41, 2.23) | 0.923   |                   | 2.70 (1.21, 6.03)  | 0.016   |                   |
| Q4                  | 2.42 (0.77, 7.61) | 0.132   |                   | 2.64 (0.97, 7.21)  | 0.058   |                   |
| Former smoker       |                   |         |                   |                    |         |                   |
| Q1                  | Ref               | Ref     |                   |                    |         |                   |
| Q2                  | 0.94 (0.54, 1.63) | 0.817   |                   |                    |         |                   |
| Q3                  | 1.34 (0.68, 2.64) | 0.393   |                   |                    |         |                   |
| Q4                  | 2.32 (0.90, 6.02) | 0.082   |                   |                    |         |                   |
| Never smoker        |                   |         |                   |                    |         |                   |
| Q1                  | Ref               | Ref     |                   |                    |         |                   |
| Q2                  | 1.10 (0.59, 2.02) | 0.768   |                   |                    |         |                   |
| Q3                  | 0.89 (0.38, 2.07) | 0.781   |                   |                    |         |                   |
| Q4                  | 1.02 (0.28, 3.74) | 0.971   |                   |                    |         |                   |
| Non-smoker          |                   |         |                   |                    |         |                   |
| Q1                  |                   |         |                   | Ref                | Ref     |                   |
| Q2                  |                   |         |                   | 0.95 (0.54, 1.67)  | 0.855   |                   |
| Q3                  |                   |         |                   | 0.95 (0.51, 1.78)  | 0.875   |                   |
| Q4                  |                   |         |                   | 0.87 (0.39, 1.93)  | 0.734   |                   |
| Alcohol consumption |                   |         | 0.236             |                    |         | 0.661             |
| Drinker             |                   |         |                   |                    |         |                   |
| Q1                  | Ref               | Ref     |                   | Ref                | Ref     |                   |
| Q2                  | 1.17 (0.73, 1.87) | 0.506   |                   | 2.11 (1.00, 4.45)  | 0.051   |                   |
| Q3                  | 1.10 (0.60, 2.01) | 0.769   |                   | 2.76 (1.17, 6.48)  | 0.02    |                   |
| Q4                  | 1.32 (0.54, 3.23) | 0.538   |                   | 3.08 (1.00, 9.55)  | 0.051   |                   |
| Non-drinker         |                   |         |                   |                    |         |                   |
| Q1                  | Ref               | Ref     |                   | Ref                | Ref     |                   |
| Q2                  | 0.96 (0.56, 1.62) | 0.865   |                   | 1.33 (0.77, 2.27)  | 0.307   |                   |
| Q3                  | 0.90 (0.47, 1.75) | 0.763   |                   | 1.04 (0.56, 1.90)  | 0.911   |                   |
| Q4                  | 2.36 (0.94, 5.93) | 0.068   |                   | 0.88 (0.41, 1.90)  | 0.747   |                   |
| Obesity             |                   |         | 0.504             |                    |         | 0.966             |
| Yes                 |                   |         |                   |                    |         |                   |
| Q1                  | Ref               | Ref     |                   | Ref                | Ref     |                   |
| Q2                  | 1.01 (0.63, 1.63) | 0.974   |                   | 2.10 (0.23, 19.34) | 0.511   |                   |
| Q3                  | 0.80 (0.45, 1.45) | 0.467   |                   | 1.56 (0.17, 14.79) | 0.696   |                   |
| Q4                  | 1.56 (0.70, 3.51) | 0.277   |                   | 1.30 (0.12, 14.60) | 0.832   |                   |
| No                  |                   |         |                   |                    |         |                   |
| Q1                  | Ref               | Ref     |                   | Ref                | Ref     |                   |
| Q2                  | 1.15 (0.68, 1.93) | 0.606   |                   | 1.54 (0.99, 2.42)  | 0.058   |                   |
| Q3                  | 1.48 (0.74, 2.95) | 0.268   |                   | 1.47 (0.88, 2.47)  | 0.143   |                   |
| Q4                  | 2.15 (0.75, 6.13) | 0.152   |                   | 1.38 (0.70, 2.71)  | 0.353   |                   |

0.50 1.0 2.0 4.0

0.50 1.0 2.0 4.0 8.00

# D METS-IR

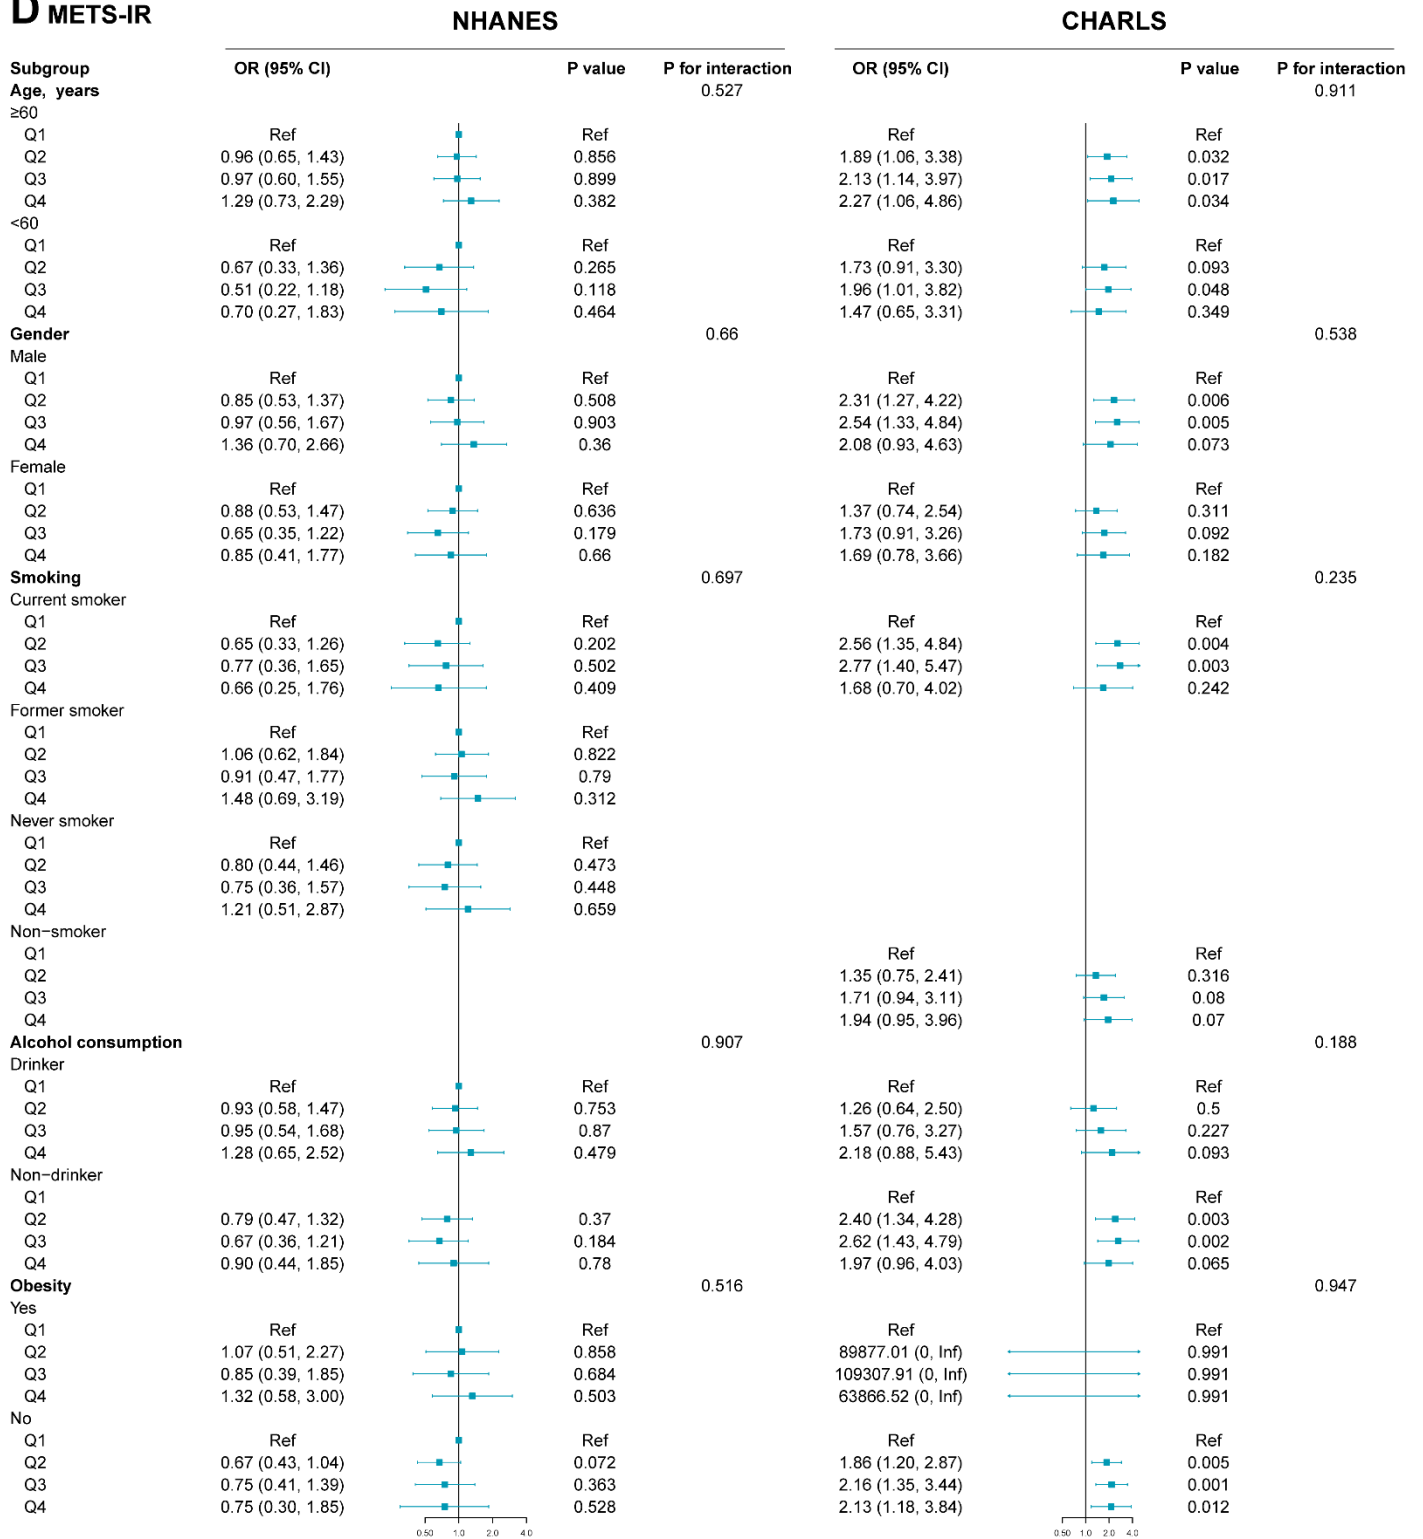

**Supplementary Figure 9** Subgroup and interaction analyses among the quartile 1–4 and stroke across various subgroups. (A) eGDR, (B) TyG, (C) TG-HDL, (D) METS-IR. eGDR, estimated glucose disposal rate. CHARLS, China Health and Retirement Longitudinal Study; CI, confidence interval; eGDR, estimated glucose disposal rate; TyG, triglyceride glucose; TG, triglyceride; HDL-C, high-density lipoprotein cholesterol; METS-IR, metabolic score for insulin resistance; NHANES, National Health and Nutrition Examination Survey; OR, odd ratio.

**A NHANES**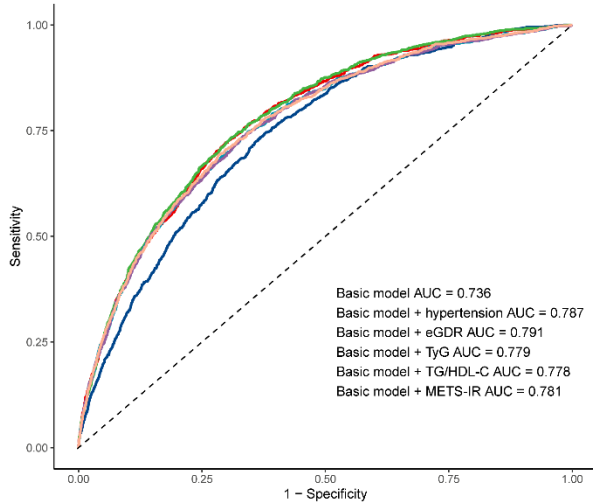**B CHARLS**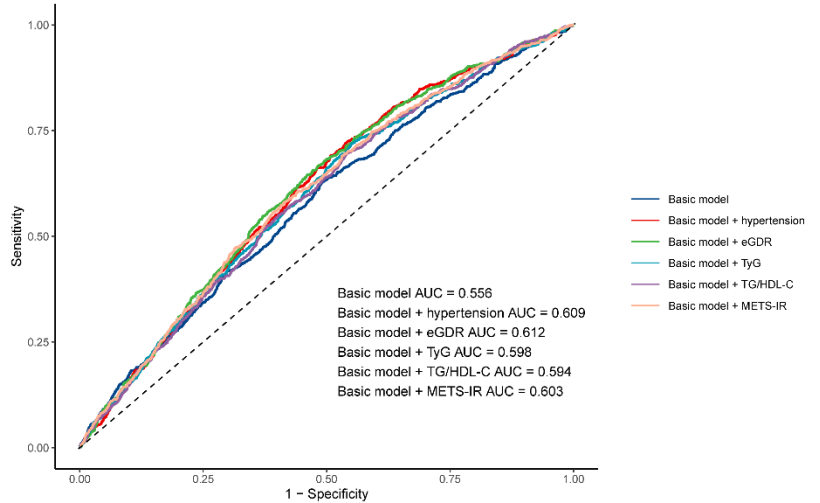

**Supplementary Figure 10** The receiver operating characteristic curves of the eGDR, TyG, TG/HDL-C and METS-IR to predict heart disease. The basic model adjusted age, sex, marital status, education, smoking, alcohol consumption status, total cholesterol, high-density lipoprotein cholesterol, triglyceride, low-density lipoprotein cholesterol, blood urea nitrogen, uric acid, hemoglobin, and obesity. eGDR, estimated glucose disposal rate; TyG, triglyceride glucose; HDL-C, high-density lipoprotein cholesterol; METS-IR, metabolic score for insulin resistance.

**A NHANES**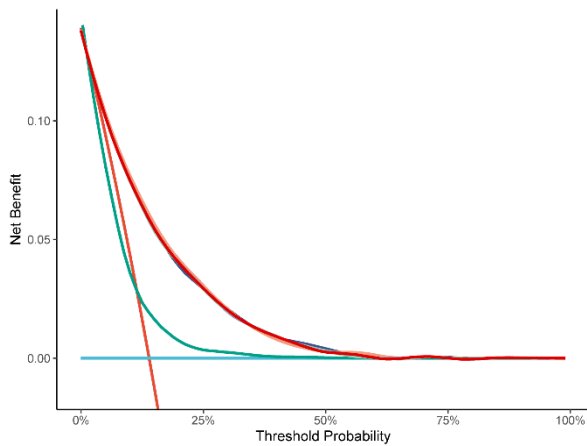**B CHARLS**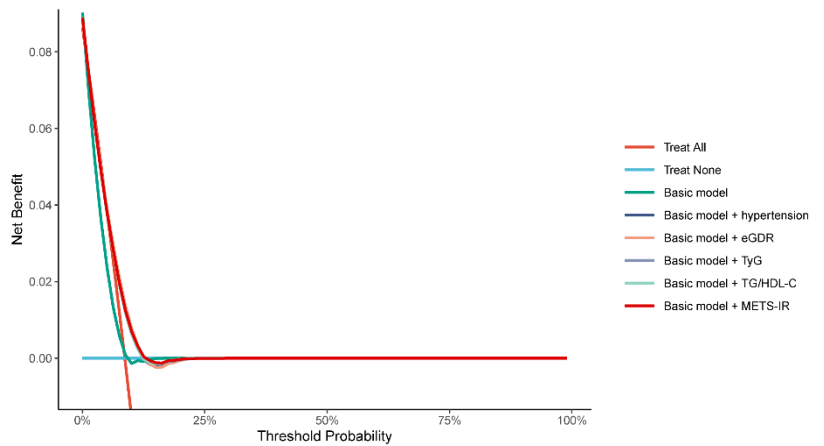

**Supplementary Figure 11** The decision curve analysis of eGDR, TyG, TG/HDL-C and METS-IR to compare the clinical utility for heart disease, the y-axis represents net benefits, calculated by subtracting the relative harm (false positives) from the benefits (true positives). The x-axis calculates the threshold probability. The basic model adjusted age, sex, marital status, education, smoking, alcohol consumption status, total cholesterol, high-density lipoprotein cholesterol, triglyceride, low-density lipoprotein cholesterol, blood urea nitrogen, uric acid, hemoglobin, and obesity. eGDR, estimated glucose disposal rate; TyG, triglyceride glucose; HDL-C, high-density lipoprotein cholesterol; METS-IR, metabolic score for insulin resistance.



**A NHANES**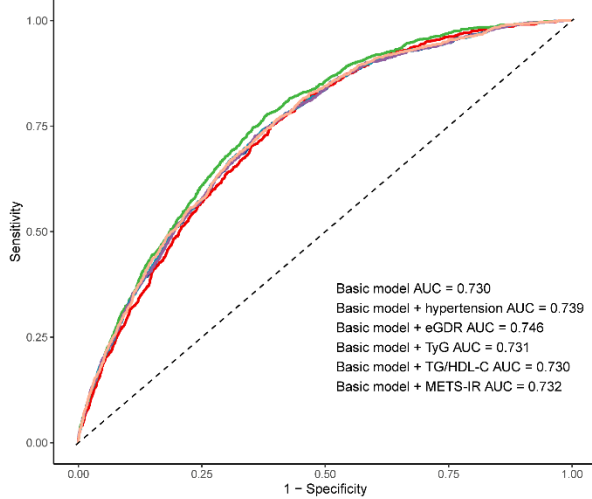**B CHARLS**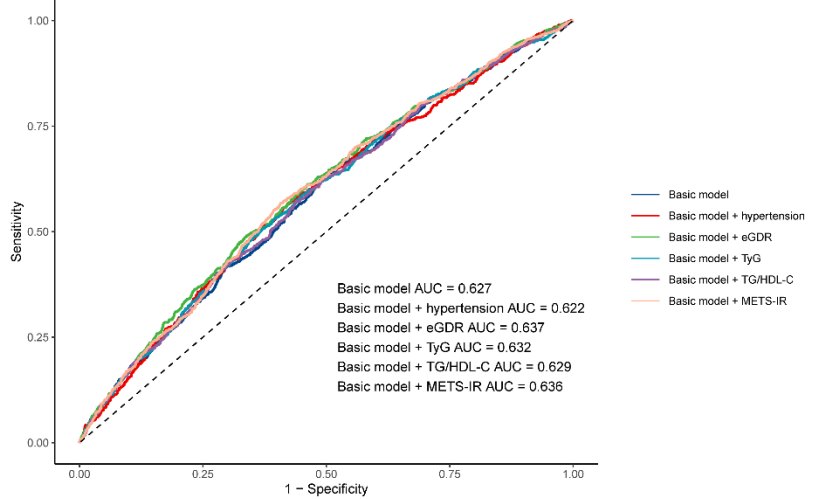

**Supplementary Figure 12** The receiver operating characteristic curves of the eGDR, TyG, TG/HDL-C and METS-IR to predict stroke. The basic model adjusted age, sex, marital status, education, smoking, alcohol consumption status, total cholesterol, high-density lipoprotein cholesterol, triglyceride, low-density lipoprotein cholesterol, blood urea nitrogen, uric acid, hemoglobin, and obesity. eGDR, estimated glucose disposal rate; TyG, triglyceride glucose; HDL-C, high-density lipoprotein cholesterol; METS-IR, metabolic score for insulin resistance.

**A NHANES**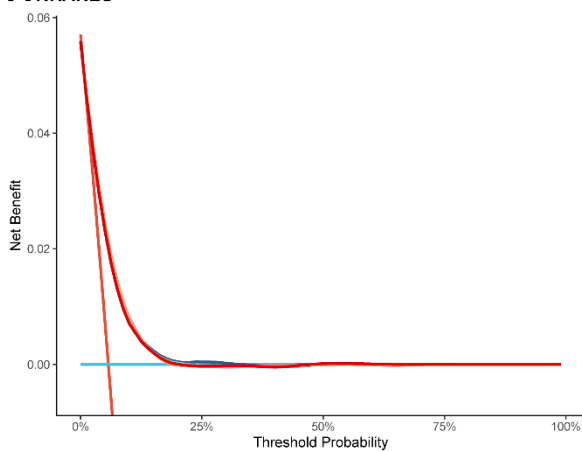**B CHARLS**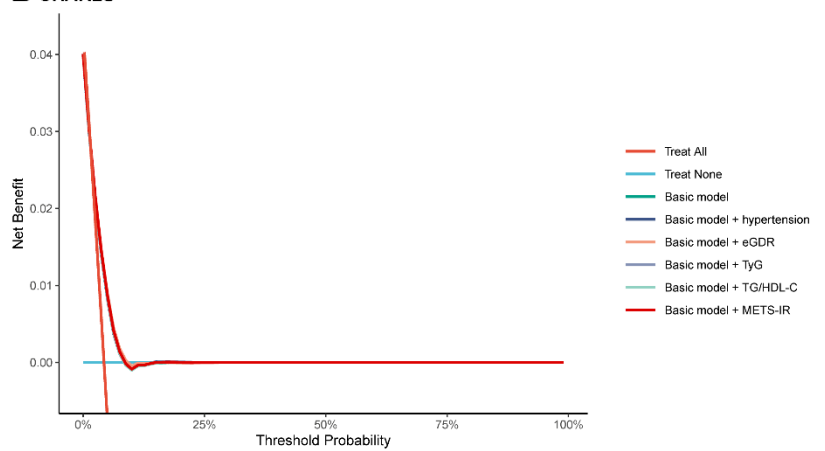

**Supplementary Figure 13** The decision curve analysis of eGDR, TyG, TG/HDL-C and METS-IR to compare the clinical utility for stroke, the y-axis represents net benefits, calculated by subtracting the relative harm (false positives) from the benefits (true positives). The x-axis calculates the threshold probability. The basic model adjusted age, sex, marital status, education, smoking, alcohol consumption status, total cholesterol, high-density lipoprotein cholesterol, triglyceride, low-density lipoprotein cholesterol, blood urea nitrogen, uric acid, hemoglobin, and obesity. eGDR, estimated glucose disposal rate; TyG, triglyceride glucose; HDL-C, high-density lipoprotein cholesterol; METS-IR, metabolic score for insulin resistance.
